# Supplementary material for: A Masked PY-NLS in Drosophila TIS11 and Its Mammalian Homolog Tristetraprolin
Source: PubMed Central journal article supplement (PMC3739726; doi:10.1371/journal.pone.0071686), 2013-08-09
Supplement: pone.0071686.s006.pdf [file pone.0071686.s006.pdf]

## Figure 2C - Raw data

This file can be opened by [GraphPad Prism](#) (version 5.00 or later).

This file contains 1 data tables and 0 info tables:

- [Fig 2C new](#)

**Fig 2C new**

| Cherry NT | Cherry LMB | Cherry-dTIS11 NT | Cherry-dTIS11 LMB | Cherry-dTIS11 delta415-436 NT | Cherry-dTIS11 delta415-436 LMB | Cherry-dTIS11 delta214-436 NT | Cherry-dTIS11 delta214-436 LMB | Cherry-dTIS11 delta98-113 NT | Cherry-dTIS11 delta98-113 LMB |
|-----------|------------|------------------|-------------------|-------------------------------|--------------------------------|-------------------------------|--------------------------------|------------------------------|-------------------------------|
| 1,63      | 2,03       | 0,75             | 2,51              | 0,66                          | 2,1                            | 0,66                          | 2,51                           | 1,43                         | 1,73                          |
| 1,6       | 1,44       | 0,85             | 2,01              | 0,99                          | 1,94                           | 0,63                          | 1,48                           | 1,7                          | 2,54                          |
| 1,37      | 1,51       | 0,93             | 2,29              | 0,89                          | 2,13                           | 0,66                          | 1,75                           | 1,35                         | 2,95                          |
| 1,58      | 1,46       | 0,85             | 2,4               | 0,9                           | 2,1                            | 0,7                           | 1,59                           | 1,51                         | 1,41                          |
| 1,89      | 2,25       | 0,75             | 2,06              | 0,84                          | 1,77                           | 0,75                          | 2,41                           | 1,05                         | 2                             |
| 1,76      | 1,69       | 0,8              | 1,76              | 0,93                          | 1,55                           | 0,69                          | 2,18                           | 1,36                         | 2,28                          |
| 1,4       | 1,49       | 0,8              | 2,41              | 0,57                          | 1,93                           | 0,74                          | 2,55                           | 1,7                          | 1,88                          |
| 1,39      | 1,42       | 0,6              | 2,15              | 0,62                          | 2,21                           | 1,01                          | 2,98                           | 1,54                         | 2,11                          |
| 1,43      | 1,33       | 0,98             | 2,01              | 0,81                          | 1,73                           | 0,75                          | 1,88                           | 1,02                         | 1,85                          |
| 1,61      | 1,99       | 0,89             | 2,07              | 0,75                          | 1,53                           | 0,83                          | 1,96                           | 1,52                         | 2,01                          |
| 1,76      | 1,83       | 0,68             | 2,16              | 0,96                          | 2,17                           | 0,8                           | 2,18                           | 1,64                         | 2,82                          |
| 1,86      | 1,63       | 0,85             | 1,97              | 0,78                          | 2,02                           | 0,66                          | 2,23                           | 1,69                         | 1,89                          |
| 1,8       | 2          | 0,79             | 1,96              | 0,82                          | 2,21                           | 0,8                           | 1,86                           | 1,26                         | 1,91                          |
| 1,7       | 1,94       | 0,88             | 2,42              | 0,69                          | 2,09                           | 0,94                          | 2,45                           | 1,36                         | 2,16                          |
| 1,55      | 1,88       | 0,74             | 1,95              | 0,75                          | 1,86                           | 0,89                          | 3,11                           | 1,62                         | 2,05                          |
| 1,25      | 1,66       | 0,69             | 2,08              | 0,81                          | 1,61                           | 0,66                          | 2,13                           | 1,13                         | 2,11                          |
| 1,46      | 1,78       | 0,71             | 2,09              | 0,7                           | 2,5                            | 0,84                          | 2,07                           | 1,47                         | 2,08                          |
| 1,52      | 1,88       | 0,77             | 2,26              | 0,5                           | 2,5                            | 0,77                          | 1,98                           | 1,62                         | 1,58                          |
| 1,46      | 1,91       | 0,87             | 2,58              | 0,91                          | 3,23                           | 0,81                          | 1,95                           | 1,34                         | 1,97                          |
| 1,6       | 2,12       | 0,95             | 2,16              | 0,84                          | 2,45                           | 0,76                          | 3,04                           | 1,56                         | 1,7                           |
| 1,8       | 1,7        | 0,72             | 1,81              | 0,83                          | 3,19                           | 0,87                          | 3,16                           | 1,47                         | 2,2                           |
| 1,78      | 1,89       | 0,5              | 1,95              | 0,93                          | 2,41                           | 0,75                          | 2,46                           | 1,44                         | 2,26                          |
| 1,91      | 1,44       | 0,89             | 1,87              | 0,86                          | 3,32                           | 0,86                          | 1,86                           | 1,52                         | 1,24                          |
| 1,81      | 1,59       | 0,69             | 1,61              | 0,83                          | 2,36                           | 0,86                          | 1,55                           | 1,15                         | 1,79                          |
| 1,71      | 1,31       | 0,78             | 1,51              | 0,85                          | 2,3                            | 0,77                          | 2,28                           | 1,31                         | 2,33                          |
| 1,94      | 1,83       | 0,84             | 2                 | 0,9                           | 2,4                            | 0,74                          | 2,5                            | 1,23                         | 1,36                          |
| 1,59      | 1,36       | 0,77             | 1,76              | 0,75                          | 2,33                           | 0,76                          | 2,48                           | 1,35                         | 1,6                           |
| 1,67      | 1,51       | 1,01             | 2,8               | 0,56                          | 2,12                           | 0,83                          | 2,03                           | 1,66                         | 1,39                          |
| 1,58      | 1,88       | 0,89             | 2,52              | 0,87                          | 1,81                           | 0,76                          | 2,42                           | 1,52                         | 1,43                          |
| 1,75      | 1,86       | 0,72             | 1,47              | 0,78                          | 1,97                           | 0,69                          | 2,87                           | 1,35                         | 2,04                          |
| 2,04      | 1,89       | 0,89             | 2,49              | 0,75                          | 3,04                           | 1                             | 2,72                           | 1,19                         | 1,29                          |
| 1,81      | 1,78       | 0,77             | 2,6               | 0,96                          | 2,06                           | 0,79                          | 2,12                           | 1,83                         | 1,72                          |
| 1,75      | 1,9        | 0,92             | 1,77              | 0,74                          | 1,57                           | 0,61                          | 2,25                           | 1,48                         | 1,94                          |
| 1,91      | 2,01       | 0,82             | 2,61              | 0,88                          | 1,69                           | 0,72                          | 2,35                           | 1,29                         | 1,7                           |
|           | 1,86       | 0,61             | 2,16              | 0,52                          | 1,91                           | 0,93                          | 2,46                           | 1,74                         | 2,2                           |
|           | 1,7        | 0,74             | 2,44              | 0,83                          | 2,1                            | 0,92                          | 2,66                           | 1,24                         | 1,35                          |

|  |  |      |  |      |      |                      |                      |  |  |
|--|--|------|--|------|------|----------------------|----------------------|--|--|
|  |  | 0,75 |  | 0,73 | 2,76 | 0,58<br>0,89<br>0,74 | 2,58<br>2,05<br>1,77 |  |  |
|--|--|------|--|------|------|----------------------|----------------------|--|--|

---

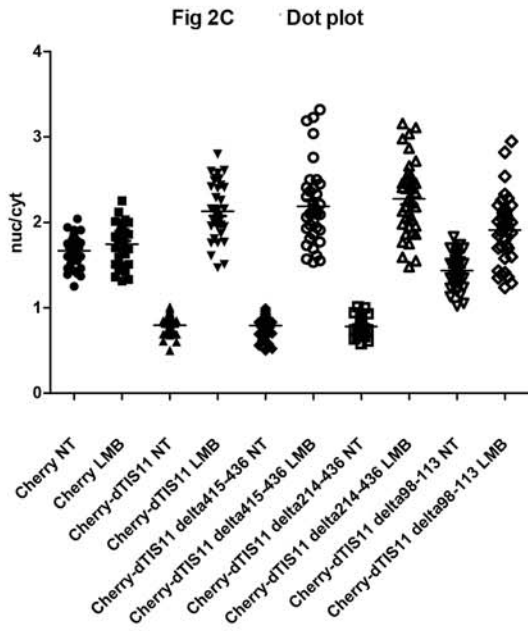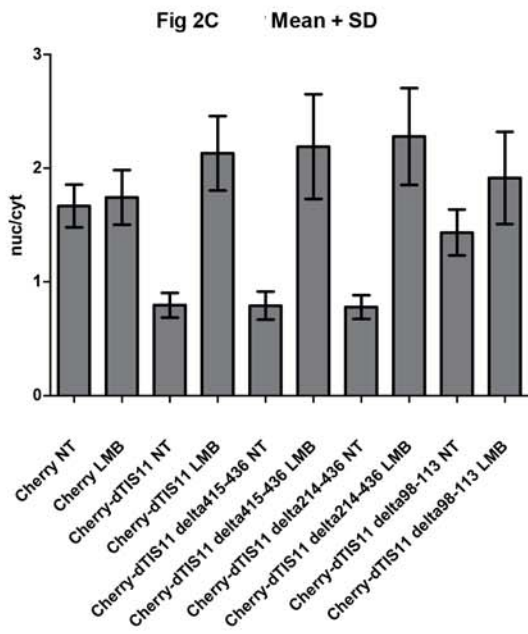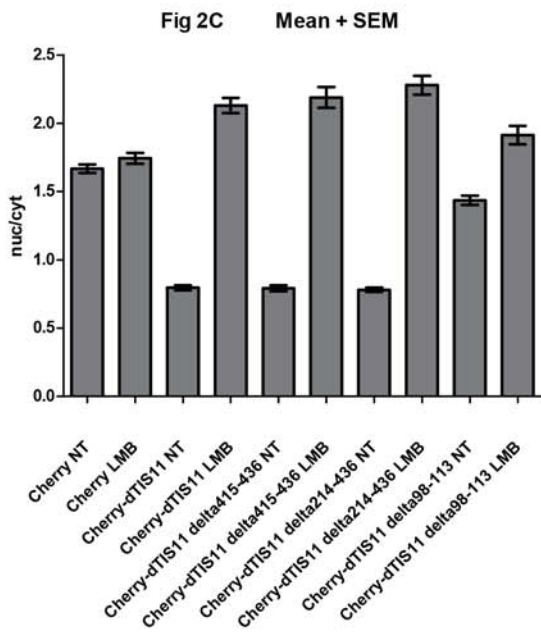

# Figure 2C - Statistical analysis

This file can be opened by [GraphPad Prism](#) (version 5.00 or later).

This file contains 11 data tables and 0 info tables:

- [Col. stats of Fig 2C new](#)
- [Cherry NT vs LMB](#)
- [Cherry-dTIS11 NT vs LMB](#)
- [Cherry-dTIS11delta415-436 NT vs LMB](#)
- [Cherry-dTIS11delta214-436 NT vs LMB](#)
- [Cherry-dTIS11delta98-113 NT vs LMB](#)
- [Cherry NT vs Cherry-dTIS11 NT](#)
- [Cherry LMB vs Cherry-dTIS11 LMB](#)
- [Cherry-dTIS11 WT vs delta415-436 NT](#)
- [Cherry-dTIS11 WT vs delta214-436 NT](#)
- [Cherry-dTIS11 WT vs delta98-113 NT](#)

## Col. stats of Fig 2C new

|                                     | Cherry NT | Cherry LMB | Cherry-dTIS11 NT | Cherry-dTIS11 LMB | Cherry-dTIS11 delta415-436 NT | Cherry-dTIS11 delta415-436 LMB | Cherry-dTIS11 delta214-436 NT | Cherry-dTIS11 delta214-436 LMB | Cherry-dTIS11 delta98-113 NT | Cherry-dTIS11 delta98-113 LMB |
|-------------------------------------|-----------|------------|------------------|-------------------|-------------------------------|--------------------------------|-------------------------------|--------------------------------|------------------------------|-------------------------------|
| Number of values                    | 34        | 36         | 37               | 36                | 37                            | 37                             | 39                            | 39                             | 36                           | 36                            |
| Minimum                             | 1.250     | 1.310      | 0.5000           | 1.470             | 0.5000                        | 1.530                          | 0.5800                        | 1.480                          | 1.020                        | 1.240                         |
| 25% Percentile                      | 1.543     | 1.510      | 0.7300           | 1.950             | 0.7350                        | 1.885                          | 0.7000                        | 1.960                          | 1.295                        | 1.625                         |
| Median                              | 1.685     | 1.805      | 0.7900           | 2.085             | 0.8200                        | 2.100                          | 0.7600                        | 2.250                          | 1.455                        | 1.925                         |
| 75% Percentile                      | 1.803     | 1.898      | 0.8850           | 2.418             | 0.8850                        | 2.405                          | 0.8600                        | 2.510                          | 1.605                        | 2.148                         |
| Maximum                             | 2.040     | 2.250      | 1.010            | 2.800             | 0.9900                        | 3.320                          | 1.010                         | 3.160                          | 1.830                        | 2.950                         |
| Mean                                | 1.667     | 1.743      | 0.7957           | 2.130             | 0.7916                        | 2.188                          | 0.7800                        | 2.278                          | 1.434                        | 1.913                         |
| Std. Deviation                      | 0.1878    | 0.2397     | 0.1088           | 0.3272            | 0.1242                        | 0.4602                         | 0.1037                        | 0.4259                         | 0.2013                       | 0.4043                        |
| Std. Error                          | 0.03221   | 0.03995    | 0.01789          | 0.05453           | 0.02041                       | 0.07565                        | 0.01660                       | 0.06819                        | 0.03355                      | 0.06739                       |
| Lower 95% CI of mean                | 1.601     | 1.662      | 0.7594           | 2.019             | 0.7502                        | 2.035                          | 0.7464                        | 2.140                          | 1.366                        | 1.776                         |
| Upper 95% CI of mean                | 1.732     | 1.824      | 0.8320           | 2.240             | 0.8330                        | 2.342                          | 0.8136                        | 2.417                          | 1.503                        | 2.050                         |
| KS normality test                   |           |            |                  |                   |                               |                                |                               |                                |                              |                               |
| KS distance                         | 0.1124    | 0.1416     | 0.06955          | 0.1020            | 0.1264                        | 0.1299                         | 0.1025                        | 0.06256                        | 0.08869                      | 0.07831                       |
| P value                             | > 0.10    | 0.0657     | > 0.10           | > 0.10            | > 0.10                        | > 0.10                         | > 0.10                        | > 0.10                         | > 0.10                       | > 0.10                        |
| Passed normality test (alpha=0.05)? | Yes       | Yes        | Yes              | Yes               | Yes                           | Yes                            | Yes                           | Yes                            | Yes                          | Yes                           |
| P value summary                     | ns        | ns         | ns               | ns                | ns                            | ns                             | ns                            | ns                             | ns                           | ns                            |
| Sum                                 | 56.67     | 62.75      | 29.44            | 76.67             | 29.29                         | 80.97                          | 30.42                         | 88.86                          | 51.64                        | 68.87                         |

## Cherry NT vs LMB

|                                         | Data Set-A           |
|-----------------------------------------|----------------------|
| Table Analyzed                          | Fig 2C new           |
| Column A                                | Cherry NT            |
| vs                                      | vs                   |
| Column B                                | Cherry LMB           |
| Unpaired t test                         |                      |
| P value                                 | 0.1444               |
| P value summary                         | ns                   |
| Are means signif. different? (P < 0.05) | No                   |
| One- or two-tailed P value?             | Two-tailed           |
| t, df                                   | t=1.476 df=68        |
| How big is the difference?              |                      |
| Mean ± SEM of column A                  | 1.667 ± 0.03221 N=34 |
| Mean ± SEM of column B                  | 1.743 ± 0.03995 N=36 |

|                                        |                    |
|----------------------------------------|--------------------|
| Difference between means               | -0.07629 ± 0.05167 |
| 95% confidence interval                | -0.1795 to 0.02692 |
| R squared                              | 0.03106            |
| F test to compare variances            |                    |
| F,DFn, Dfd                             | 1.629, 35, 33      |
| P value                                | 0.1619             |
| P value summary                        | ns                 |
| Are variances significantly different? | No                 |

#### Cherry-dTIS11 NT vs LMB

|                                         | Data Set-A            |
|-----------------------------------------|-----------------------|
| Table Analyzed                          | Fig. 2C               |
| Column C                                | Cherry-dTIS11 NT      |
| vs                                      | vs                    |
| Column D                                | Cherry-dTIS11 LMB     |
| Unpaired t test with Welch's correction |                       |
| P value                                 | < 0.0001              |
| P value summary                         | ***                   |
| Are means signif. different? (P < 0.05) | Yes                   |
| One- or two-tailed P value?             | Two-tailed            |
| Welch-corrected t, df                   | t=23.24 df=42         |
| How big is the difference?              |                       |
| Mean ± SEM of column C                  | 0.7957 ± 0.01789 N=37 |
| Mean ± SEM of column D                  | 2.130 ± 0.05453 N=36  |
| Difference between means                | -1.334 ± 0.05739      |
| 95% confidence interval                 | -1.450 to -1.218      |
| R squared                               | 0.9279                |
| F test to compare variances             |                       |
| F,DFn, Dfd                              | 9.041, 35, 36         |
| P value                                 | < 0.0001              |
| P value summary                         | ***                   |
| Are variances significantly different?  | Yes                   |

#### Cherry-dTIS11delta415-436 NT vs LMB

|                                         | Data Set-A                     |
|-----------------------------------------|--------------------------------|
| Table Analyzed                          | Fig. 2C                        |
| Column E                                | Cherry-dTIS11 delta415-436 NT  |
| vs                                      | vs                             |
| Column F                                | Cherry-dTIS11 delta415-436 LMB |
| Unpaired t test with Welch's correction |                                |
| P value                                 | < 0.0001                       |
| P value summary                         | ***                            |
| Are means signif. different? (P < 0.05) | Yes                            |
| One- or two-tailed P value?             | Two-tailed                     |
| Welch-corrected t, df                   | t=17.83 df=41                  |
| How big is the difference?              |                                |
| Mean ± SEM of column E                  | 0.7916 ± 0.02041 N=37          |
| Mean ± SEM of column F                  | 2.188 ± 0.07565 N=37           |
| Difference between means                | -1.397 ± 0.07835               |
| 95% confidence interval                 | -1.555 to -1.238               |
| R squared                               | 0.8857                         |
| F test to compare variances             |                                |
| F,DFn, Dfd                              | 13.74, 36, 36                  |
| P value                                 | < 0.0001                       |
| P value summary                         | ***                            |
| Are variances significantly different?  | Yes                            |

**Cherry-dTIS11delta214-436 NT vs LMB**

|                                         | Data Set-A                     |
|-----------------------------------------|--------------------------------|
| Table Analyzed                          | Fig 2C                         |
| Column G                                | Cherry-dTIS11 delta214-436 NT  |
| vs                                      | vs                             |
| Column H                                | Cherry-dTIS11 delta214-436 LMB |
| Unpaired t test with Welch's correction |                                |
| P value                                 | < 0.0001                       |
| P value summary                         | ***                            |
| Are means signif. different? (P < 0.05) | Yes                            |
| One- or two-tailed P value?             | Two-tailed                     |
| Welch-corrected t, df                   | t=21.35 df=42                  |
| How big is the difference?              |                                |
| Mean ± SEM of column G                  | 0.7800 ± 0.01660 N=39          |
| Mean ± SEM of column H                  | 2.278 ± 0.06819 N=39           |
| Difference between means                | -1.498 ± 0.07018               |
| 95% confidence interval                 | -1.640 to -1.357               |
| R squared                               | 0.9156                         |
| F test to compare variances             |                                |
| F,DFn, Dfd                              | 16.87, 38, 38                  |
| P value                                 | < 0.0001                       |
| P value summary                         | ***                            |
| Are variances significantly different?  | Yes                            |

**Cherry-dTIS11delta98-113 NT vs LMB**

|                                         | Data Set-A                    |
|-----------------------------------------|-------------------------------|
| Table Analyzed                          | Fig. 2C                       |
| Column I                                | Cherry-dTIS11 delta98-113 NT  |
| vs                                      | vs                            |
| Column J                                | Cherry-dTIS11 delta98-113 LMB |
| Unpaired t test with Welch's correction |                               |
| P value                                 | < 0.0001                      |
| P value summary                         | ***                           |
| Are means signif. different? (P < 0.05) | Yes                           |
| One- or two-tailed P value?             | Two-tailed                    |
| Welch-corrected t, df                   | t=6.358 df=51                 |
| How big is the difference?              |                               |
| Mean ± SEM of column I                  | 1.434 ± 0.03355 N=36          |
| Mean ± SEM of column J                  | 1.913 ± 0.06739 N=36          |
| Difference between means                | -0.4786 ± 0.07528             |
| 95% confidence interval                 | -0.6299 to -0.3273            |
| R squared                               | 0.4422                        |
| F test to compare variances             |                               |
| F,DFn, Dfd                              | 4.035, 35, 35                 |
| P value                                 | < 0.0001                      |
| P value summary                         | ***                           |
| Are variances significantly different?  | Yes                           |

**Cherry NT vs Cherry-dTIS11 NT**

|                                         | Data Set-A       |
|-----------------------------------------|------------------|
| Table Analyzed                          | Fig 2C new       |
| Column A                                | Cherry NT        |
| vs                                      | vs               |
| Column C                                | Cherry-dTIS11 NT |
| Unpaired t test with Welch's correction |                  |
| P value                                 | < 0.0001         |

|                                         |                       |
|-----------------------------------------|-----------------------|
| P value summary                         | ***                   |
| Are means signif. different? (P < 0.05) | Yes                   |
| One- or two-tailed P value?             | Two-tailed            |
| Welch-corrected t, df                   | t=23.64 df=51         |
| How big is the difference?              |                       |
| Mean ± SEM of column A                  | 1.667 ± 0.03221 N=34  |
| Mean ± SEM of column C                  | 0.7957 ± 0.01789 N=37 |
| Difference between means                | 0.8711 ± 0.03684      |
| 95% confidence interval                 | 0.7971 to 0.9451      |
| R squared                               | 0.9164                |
| F test to compare variances             |                       |
| F,DFn, Dfd                              | 2.978, 33, 36         |
| P value                                 | 0.0017                |
| P value summary                         | **                    |
| Are variances significantly different?  | Yes                   |

#### Cherry LMB vs Cherry-dTIS11 LMB

|                                         | Data Set-A           |
|-----------------------------------------|----------------------|
| Table Analyzed                          | Fig. 2C              |
| Column B                                | Cherry LMB           |
| vs                                      | vs                   |
| Column D                                | Cherry-dTIS11 LMB    |
| Unpaired t test                         |                      |
| P value                                 | < 0.0001             |
| P value summary                         | ***                  |
| Are means signif. different? (P < 0.05) | Yes                  |
| One- or two-tailed P value?             | Two-tailed           |
| t, df                                   | t=5.720 df=70        |
| How big is the difference?              |                      |
| Mean ± SEM of column B                  | 1.743 ± 0.03995 N=36 |
| Mean ± SEM of column D                  | 2.130 ± 0.05453 N=36 |
| Difference between means                | -0.3867 ± 0.06760    |
| 95% confidence interval                 | -0.5216 to -0.2517   |
| R squared                               | 0.3185               |
| F test to compare variances             |                      |
| F,DFn, Dfd                              | 1.863, 35, 35        |
| P value                                 | 0.0697               |
| P value summary                         | ns                   |
| Are variances significantly different?  | No                   |

#### Cherry-dTIS11 WT vs delta415-436 NT

|                                         | Data Set-A                    |
|-----------------------------------------|-------------------------------|
| Table Analyzed                          | Fig. 2C                       |
| Column C                                | Cherry-dTIS11 NT              |
| vs                                      | vs                            |
| Column E                                | Cherry-dTIS11 delta415-436 NT |
| Unpaired t test                         |                               |
| P value                                 | 0.8817                        |
| P value summary                         | ns                            |
| Are means signif. different? (P < 0.05) | No                            |
| One- or two-tailed P value?             | Two-tailed                    |
| t, df                                   | t=0.1494 df=72                |
| How big is the difference?              |                               |
| Mean ± SEM of column C                  | 0.7957 ± 0.01789 N=37         |
| Mean ± SEM of column E                  | 0.7916 ± 0.02041 N=37         |
| Difference between means                | 0.004054 ± 0.02714            |
| 95% confidence interval                 | -0.05012 to 0.05823           |
| R squared                               | 0.0003098                     |

|                                        |               |
|----------------------------------------|---------------|
| F test to compare variances            |               |
| F,DFn, Dfd                             | 1.302, 36, 36 |
| P value                                | 0.4329        |
| P value summary                        | ns            |
| Are variances significantly different? | No            |

#### Cherry-dTIS11 WT vs delta214-436 NT

|                                         | Data Set-A                    |
|-----------------------------------------|-------------------------------|
| Table Analyzed                          | Fig. 2C                       |
| Column C                                | Cherry-dTIS11 NT              |
| vs                                      | vs                            |
| Column G                                | Cherry-dTIS11 delta214-436 NT |
| Unpaired t test                         |                               |
| P value                                 | 0.5222                        |
| P value summary                         | ns                            |
| Are means signif. different? (P < 0.05) | No                            |
| One- or two-tailed P value?             | Two-tailed                    |
| t, df                                   | t=0.6431 df=74                |
| How big is the difference?              |                               |
| Mean ± SEM of column C                  | 0.7957 ± 0.01789 N=37         |
| Mean ± SEM of column G                  | 0.7800 ± 0.01660 N=39         |
| Difference between means                | 0.01568 ± 0.02438             |
| 95% confidence interval                 | -0.03296 to 0.06432           |
| R squared                               | 0.005557                      |
| F test to compare variances             |                               |
| F,DFn, Dfd                              | 1.101, 36, 38                 |
| P value                                 | 0.7684                        |
| P value summary                         | ns                            |
| Are variances significantly different?  | No                            |

#### Cherry-dTIS11 WT vs delta98-113 NT

|                                         | Data Set-A                   |
|-----------------------------------------|------------------------------|
| Table Analyzed                          | Fig. 2C                      |
| Column C                                | Cherry-dTIS11 NT             |
| vs                                      | vs                           |
| Column I                                | Cherry-dTIS11 delta98-113 NT |
| Unpaired t test with Welch's correction |                              |
| P value                                 | < 0.0001                     |
| P value summary                         | ***                          |
| Are means signif. different? (P < 0.05) | Yes                          |
| One- or two-tailed P value?             | Two-tailed                   |
| Welch-corrected t, df                   | t=16.80 df=53                |
| How big is the difference?              |                              |
| Mean ± SEM of column C                  | 0.7957 ± 0.01789 N=37        |
| Mean ± SEM of column I                  | 1.434 ± 0.03355 N=36         |
| Difference between means                | -0.6388 ± 0.03802            |
| 95% confidence interval                 | -0.7151 to -0.5624           |
| R squared                               | 0.8419                       |
| F test to compare variances             |                              |
| F,DFn, Dfd                              | 3.421, 35, 36                |
| P value                                 | 0.0004                       |
| P value summary                         | ***                          |
| Are variances significantly different?  | Yes                          |



## Figure 2E - Raw data

This file can be opened by [GraphPad Prism](#) (version 5.00 or later).

This file contains 1 data tables and 0 info tables:

- [Fig 2E](#)

**Fig 2E**

| Cherry NT | Cherry +LMB | Cherry-dTIS11 97-131 NT | Cherry-dTIS11 97-131 +LMB |
|-----------|-------------|-------------------------|---------------------------|
| 2,056     | 1,984       | 1,29                    | 1,612                     |
| 2,112     | 1,842       | 1,346                   | 1,977                     |
| 1,901     | 1,855       | 1,322                   | 1,769                     |
| 2,056     | 1,829       | 1,045                   | 1,629                     |
| 1,879     | 1,865       | 1,113                   | 1,62                      |
| 1,58      | 1,69        | 1,152                   | 1,936                     |
| 1,676     | 1,974       | 1,14                    | 1,466                     |
| 1,654     | 1,82        | 1,343                   | 1,841                     |
| 2,366     | 1,498       | 1,233                   | 1,556                     |
| 2,082     | 1,976       | 1,386                   | 1,704                     |
| 1,784     | 1,963       | 1,083                   | 2,028                     |
| 2,013     | 2,042       | 1,391                   | 2,084                     |
| 1,7       | 2,195       | 1,784                   | 1,444                     |
| 1,579     | 2,174       | 1,601                   | 1,77                      |
| 1,593     | 1,761       | 0,932                   | 1,804                     |
| 2,345     | 1,909       | 1,062                   | 1,622                     |
| 2,101     | 2,031       | 1,659                   | 1,591                     |
| 1,776     | 1,845       | 1,133                   | 1,935                     |
| 1,933     | 1,913       | 1,135                   | 1,84                      |
| 2,004     | 1,613       | 1,066                   | 1,68                      |
| 1,631     | 2,068       | 1,064                   | 1,716                     |
| 1,807     | 2,062       | 1,061                   | 1,607                     |
| 1,862     | 1,871       | 1,135                   | 1,7                       |
| 1,806     | 2,183       | 1,428                   | 1,537                     |
| 1,53      | 2,031       | 0,974                   | 2,028                     |
| 2,068     | 1,781       | 1,049                   | 1,319                     |
| 1,576     | 2,058       | 1,257                   | 1,737                     |
| 1,668     | 1,577       | 1,248                   | 1,883                     |
| 1,711     | 1,808       | 0,996                   | 1,445                     |
| 1,971     | 1,995       | 1,021                   | 1,428                     |
| 2,163     | 2,086       | 1,143                   | 1,584                     |
| 1,667     | 1,755       | 0,87                    | 1,468                     |
| 1,489     | 2,305       | 1,15                    | 1,506                     |
| 1,643     | 1,831       | 1,577                   | 1,727                     |
| 1,529     | 1,851       | 1,015                   | 1,862                     |
| 1,748     | 1,449       | 1,05                    | 1,836                     |

Fig 2E Dot plot

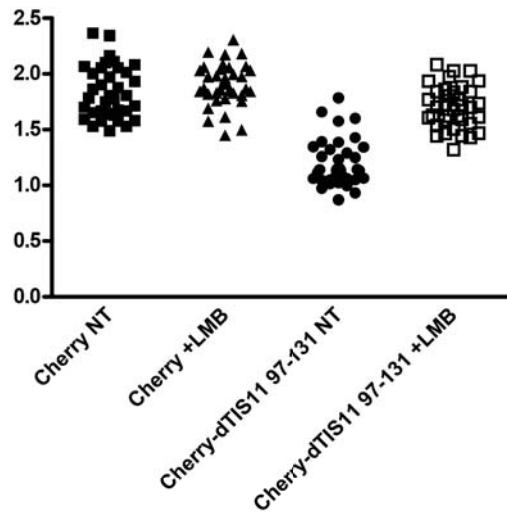

Fig 2E Mean +SD

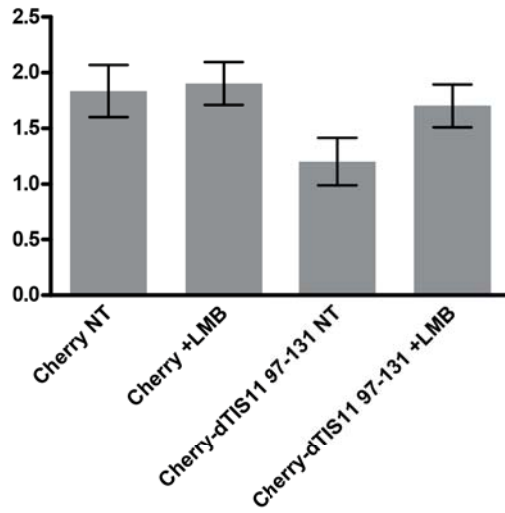

Fig 2E Mean +SEM

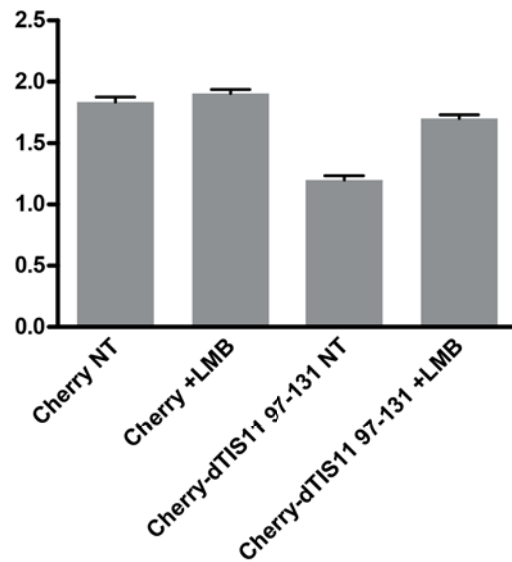

## Figure 2E - Statistical analysis

This file can be opened by [GraphPad Prism](#) (version 5.00 or later).

This file contains 4 data tables and 0 info tables:

- [Col Stats of Fig 2E](#)
- [Cherry NT vs LMB](#)
- [Cherry-dTIS11 97-131 NT vs LMB](#)
- [Cherry NT vs Cherry-dTIS11 97-131 NT](#)

### Col Stats of Fig 2E

|                                     | Cherry NT | Cherry +LMB | Cherry-dTIS11 97-131 NT | Cherry-dTIS11 97-131 +LMB |
|-------------------------------------|-----------|-------------|-------------------------|---------------------------|
| Number of values                    | 36        | 36          | 36                      | 36                        |
| Minimum                             | 1.489     | 1.449       | 0.8700                  | 1.319                     |
| 25% Percentile                      | 1.646     | 1.811       | 1.053                   | 1.563                     |
| Median                              | 1.795     | 1.890       | 1.138                   | 1.702                     |
| 75% Percentile                      | 2.045     | 2.039       | 1.338                   | 1.841                     |
| Maximum                             | 2.366     | 2.305       | 1.784                   | 2.084                     |
| Mean                                | 1.835     | 1.903       | 1.202                   | 1.703                     |
| Std. Deviation                      | 0.2336    | 0.1923      | 0.2124                  | 0.1922                    |
| Std. Error                          | 0.03893   | 0.03205     | 0.03540                 | 0.03204                   |
| Lower 95% CI of mean                | 1.756     | 1.837       | 1.130                   | 1.637                     |
| Upper 95% CI of mean                | 1.914     | 1.968       | 1.273                   | 1.768                     |
| KS normality test                   |           |             |                         |                           |
| KS distance                         | 0.1189    | 0.08933     | 0.2033                  | 0.09338                   |
| P value                             | > 0.10    | > 0.10      | 0.0006                  | > 0.10                    |
| Passed normality test (alpha=0.05)? | Yes       | Yes         | No                      | Yes                       |
| P value summary                     | ns        | ns          | ***                     | ns                        |
| Sum                                 | 66.06     | 68.49       | 43.25                   | 61.29                     |

### Cherry NT vs LMB

|                               | Data Set-A             |
|-------------------------------|------------------------|
| Table Analyzed                | Fig 2E                 |
| Column A                      | Cherry NT              |
| vs                            | vs                     |
| Column B                      | Cherry +LMB            |
| Mann Whitney test             |                        |
| P value                       | 0.1342                 |
| Exact or approximate P value? | Gaussian Approximation |

|                                           |             |
|-------------------------------------------|-------------|
| P value summary                           | ns          |
| Are medians signif. different? (P < 0.05) | No          |
| One- or two-tailed P value?               | Two-tailed  |
| Sum of ranks in column A,B                | 1181 , 1448 |
| Mann-Whitney U                            | 514.5       |

**Cherry-dTIS11 97-131 NT vs LMB**

|                                           | Data Set-A                |
|-------------------------------------------|---------------------------|
| Table Analyzed                            | Fig 2E                    |
| Column C                                  | Cherry-dTIS11 97-131 NT   |
| vs                                        | vs                        |
| Column D                                  | Cherry-dTIS11 97-131 +LMB |
| Mann Whitney test                         |                           |
| P value                                   | < 0.0001                  |
| Exact or approximate P value?             | Gaussian Approximation    |
| P value summary                           | ***                       |
| Are medians signif. different? (P < 0.05) | Yes                       |
| One- or two-tailed P value?               | Two-tailed                |
| Sum of ranks in column C,D                | 732.5 , 1896              |
| Mann-Whitney U                            | 66.50                     |

**Cherry NT vs Cherry-dTIS11 97-131 NT**

|                                           | Data Set-A              |
|-------------------------------------------|-------------------------|
| Table Analyzed                            | Fig 2E                  |
| Column A                                  | Cherry NT               |
| vs                                        | vs                      |
| Column C                                  | Cherry-dTIS11 97-131 NT |
| Mann Whitney test                         |                         |
| P value                                   | < 0.0001                |
| Exact or approximate P value?             | Gaussian Approximation  |
| P value summary                           | ***                     |
| Are medians signif. different? (P < 0.05) | Yes                     |
| One- or two-tailed P value?               | Two-tailed              |
| Sum of ranks in column A,C                | 1924 , 704.5            |
| Mann-Whitney U                            | 38.50                   |

# Figure 3B - Raw data

This file can be opened by [GraphPad Prism](#) (version 5.00 or later).

This file contains 1 data tables and 0 info tables:

- [Data 1](#)

## Data 1

| Cherry NT | Cherry +LMB | Cherry +NaN3 | Cherry +LMB+NaN3 | Cherry-dTIS11 NT | Cherry-dTIS11 +LMB | Cherry-dTIS11 +NaN3 | Cherry-dTIS11 +LMB+NaN3 |
|-----------|-------------|--------------|------------------|------------------|--------------------|---------------------|-------------------------|
| 1,406     | 1,726       | 1,538        | 1,567            | 0,788            | 1,773              | 0,975               | 1,016                   |
| 1,478     | 1,345       | 1,758        | 1,706            | 0,874            | 1,627              | 0,928               | 0,937                   |
| 1,75      | 1,52        | 1,518        | 1,799            | 0,604            | 1,62               | 0,855               | 0,921                   |
| 2,333     | 1,753       | 1,358        | 1,541            | 0,853            | 1,835              | 1,214               | 1,189                   |
| 1,913     | 1,525       | 1,696        | 1,672            | 0,841            | 1,189              | 1,009               | 1,062                   |
| 1,991     | 1,591       | 1,832        | 1,67             | 0,673            | 1,455              | 1,001               | 1,132                   |
| 2,135     | 1,714       | 1,777        | 1,515            | 0,706            | 1,555              | 1,565               | 1,107                   |
| 2,1       | 1,801       | 1,263        | 1,811            | 0,667            | 1,533              | 1,159               | 0,896                   |
| 1,736     | 1,243       | 1,889        | 2,036            | 0,838            | 1,632              | 0,94                | 0,854                   |
| 1,707     | 1,374       | 1,284        | 1,548            | 0,682            | 1,213              | 0,859               | 0,958                   |
| 1,698     | 1,527       | 1,794        | 1,645            | 0,895            | 1,54               | 0,961               | 0,937                   |
| 2,189     | 1,76        | 2,051        | 1,758            | 0,917            | 1,655              | 1,054               | 1,016                   |
| 1,983     | 1,707       | 2,021        | 1,678            | 0,736            | 1,467              | 0,84                | 1,306                   |
| 1,463     | 1,425       | 2,014        | 1,442            | 0,808            | 1,588              | 0,972               | 1,449                   |
| 1,564     | 1,664       | 1,801        | 1,415            | 0,698            | 1,429              | 0,892               | 0,888                   |
| 1,949     | 1,475       | 2,004        | 1,997            | 0,829            | 1,517              | 1,035               | 1,032                   |
| 1,899     | 1,679       | 1,874        | 1,738            | 0,801            | 1,539              | 0,931               | 0,966                   |
| 1,546     | 1,843       | 1,878        | 1,994            | 0,846            | 1,661              | 0,872               | 1,051                   |
| 1,57      | 1,732       | 1,667        | 2,017            | 0,633            | 1,49               | 0,901               | 1,418                   |
| 1,934     | 1,811       | 1,547        | 1,691            | 0,883            | 2,177              | 1,029               | 0,973                   |
| 2,002     | 1,778       | 1,514        | 1,71             | 0,606            | 1,867              | 0,971               | 1,024                   |
| 1,798     | 1,497       | 1,486        | 1,873            | 0,846            | 1,344              | 0,83                | 0,994                   |
| 1,883     | 1,359       | 1,337        | 1,987            | 0,751            | 1,417              | 1,218               | 0,835                   |
| 1,195     | 1,952       | 1,499        | 1,583            | 0,812            | 1,652              | 0,822               | 0,889                   |
| 1,337     | 1,964       | 1,522        | 1,581            | 0,63             | 1,558              | 1,053               | 0,928                   |
| 1,845     | 1,96        | 1,657        | 1,283            | 0,577            | 1,469              | 1,087               | 0,838                   |
| 1,611     | 2,021       | 1,567        | 1,368            | 0,798            | 1,266              | 0,999               | 0,925                   |
| 1,616     | 1,745       | 1,741        | 1,751            | 0,754            | 1,473              | 1,281               | 0,927                   |
| 1,644     | 1,699       | 1,683        | 1,708            | 1,023            | 1,626              | 0,799               | 0,919                   |
| 1,482     | 1,716       | 2,218        | 1,487            | 0,782            | 1,201              | 0,835               | 0,957                   |
| 1,781     | 1,811       | 1,585        | 1,73             | 0,973            | 1,417              | 0,851               | 1,034                   |
| 1,651     | 1,963       | 1,712        | 1,584            | 0,938            | 1,203              | 1,052               | 0,806                   |
| 1,627     | 1,714       | 1,549        | 1,535            | 0,812            |                    |                     |                         |
| 2,263     |             | 1,66         | 1,555            |                  |                    |                     |                         |
| 1,463     |             |              | 1,375            |                  |                    |                     |                         |
| 1,644     |             |              | 1,436            |                  |                    |                     |                         |
| 1,457     |             |              |                  |                  |                    |                     |                         |

Fig 3B Dot plot

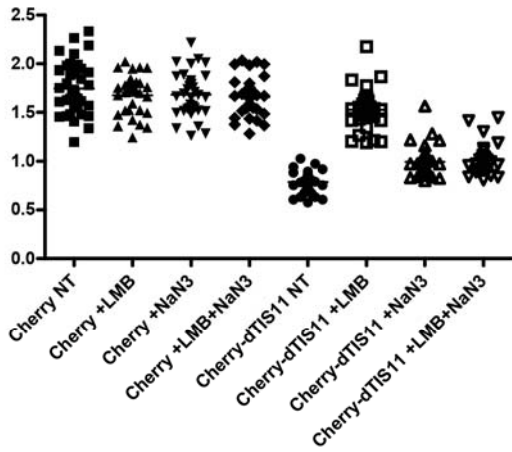

Fig 3B Mean +SD

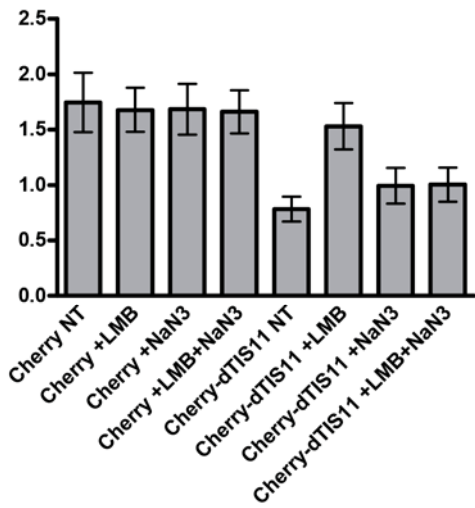

Fig 3B Mean +SEM

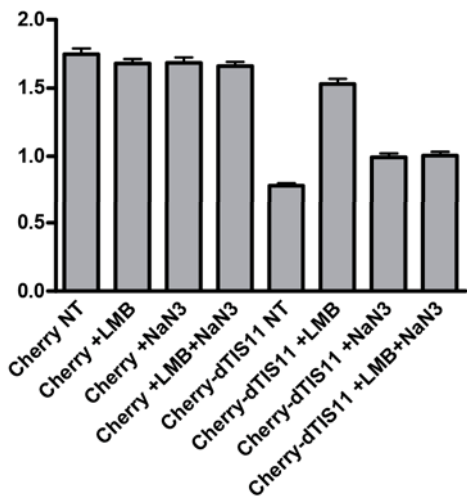

## Figure 3B - Statistical analysis

This file can be opened by [GraphPad Prism](#) (version 5.00 or later).

This file contains 8 data tables and 0 info tables:

- [Col Stats of Data 1](#)
- [Cherry NT vs LMB](#)
- [Cherry NT vs NaN3](#)
- [Cherry NT vs NaN3+LMB](#)
- [Cherry-dTIS11 NT vs LMB](#)
- [Cherry-dTIS11 NT vs NaN3](#)
- [Cherry-dTIS11 NT vs NaN3+LMB](#)
- [Cherry-dTIS11 NaN3 vs NaN3+LMB](#)

### Col Stats of Data 1

|                                     | Cherry NT | Cherry +LMB | Cherry +NaN3 | Cherry +LMB+NaN3 | Cherry-dTIS11 NT | Cherry-dTIS11 +LMB | Cherry-dTIS11 +NaN3 | Cherry-dTIS11 +LMB+NaN3 |
|-------------------------------------|-----------|-------------|--------------|------------------|------------------|--------------------|---------------------|-------------------------|
| Number of values                    | 37        | 33          | 34           | 36               | 33               | 32                 | 32                  | 32                      |
| Minimum                             | 1.195     | 1.243       | 1.263        | 1.283            | 0.5770           | 1.189              | 0.7990              | 0.8060                  |
| 25% Percentile                      | 1.555     | 1.523       | 1.521        | 1.537            | 0.6900           | 1.420              | 0.8623              | 0.9195                  |
| Median                              | 1.707     | 1.714       | 1.675        | 1.671            | 0.8010           | 1.536              | 0.9715              | 0.9620                  |
| 75% Percentile                      | 1.942     | 1.806       | 1.843        | 1.756            | 0.8495           | 1.631              | 1.053               | 1.047                   |
| Maximum                             | 2.333     | 2.021       | 2.218        | 2.036            | 1.023            | 2.177              | 1.565               | 1.449                   |
| Mean                                | 1.747     | 1.679       | 1.685        | 1.661            | 0.7841           | 1.531              | 0.9934              | 1.006                   |
| Std. Deviation                      | 0.2680    | 0.1986      | 0.2290       | 0.1944           | 0.1112           | 0.2098             | 0.1612              | 0.1538                  |
| Std. Error                          | 0.04406   | 0.03456     | 0.03927      | 0.03241          | 0.01935          | 0.03708            | 0.02850             | 0.02720                 |
| Lower 95% CI of mean                | 1.658     | 1.608       | 1.605        | 1.595            | 0.7446           | 1.455              | 0.9353              | 0.9503                  |
| Upper 95% CI of mean                | 1.836     | 1.749       | 1.765        | 1.727            | 0.8235           | 1.607              | 1.052               | 1.061                   |
| KS normality test                   |           |             |              |                  |                  |                    |                     |                         |
| KS distance                         | 0.09951   | 0.1470      | 0.08080      | 0.09787          | 0.09867          | 0.1426             | 0.1661              | 0.1772                  |
| P value                             | > 0.10    | 0.0681      | > 0.10       | > 0.10           | > 0.10           | 0.0968             | 0.0250              | 0.0120                  |
| Passed normality test (alpha=0.05)? | Yes       | Yes         | Yes          | Yes              | Yes              | Yes                | No                  | No                      |
| P value summary                     | ns        | ns          | ns           | ns               | ns               | ns                 | *                   | *                       |
| Sum                                 | 64.64     | 55.39       | 57.29        | 59.79            | 25.87            | 48.99              | 31.79               | 32.18                   |

### Cherry NT vs LMB

|                                           | Data Set-A             |
|-------------------------------------------|------------------------|
| Table Analyzed                            | Data 1                 |
| Column A                                  | Cherry NT              |
| vs                                        | vs                     |
| Column B                                  | Cherry +LMB            |
| Mann Whitney test                         |                        |
| P value                                   | 0.4621                 |
| Exact or approximate P value?             | Gaussian Approximation |
| P value summary                           | ns                     |
| Are medians signif. different? (P < 0.05) | No                     |
| One- or two-tailed P value?               | Two-tailed             |
| Sum of ranks in column A,B                | 1377 , 1109            |
| Mann-Whitney U                            | 547.5                  |

---

**Cherry NT vs NaN3**

|                                           | Data Set-A             |
|-------------------------------------------|------------------------|
| Table Analyzed                            | Data 1                 |
| Column A                                  | Cherry NT              |
| vs                                        | vs                     |
| Column C                                  | Cherry +NaN3           |
| Mann Whitney test                         |                        |
| P value                                   | 0.4474                 |
| Exact or approximate P value?             | Gaussian Approximation |
| P value summary                           | ns                     |
| Are medians signif. different? (P < 0.05) | No                     |
| One- or two-tailed P value?               | Two-tailed             |
| Sum of ranks in column A,C                | 1399 , 1158            |
| Mann-Whitney U                            | 562.5                  |

---

**Cherry NT vs NaN3+LMB**

|                                           | Data Set-A             |
|-------------------------------------------|------------------------|
| Table Analyzed                            | Data 1                 |
| Column A                                  | Cherry NT              |
| vs                                        | vs                     |
| Column D                                  | Cherry +LMB+NaN3       |
| Mann Whitney test                         |                        |
| P value                                   | 0.2186                 |
| Exact or approximate P value?             | Gaussian Approximation |
| P value summary                           | ns                     |
| Are medians signif. different? (P < 0.05) | No                     |
| One- or two-tailed P value?               | Two-tailed             |
| Sum of ranks in column A,D                | 1481 , 1220            |
| Mann-Whitney U                            | 554.0                  |

---

**Cherry-dTIS11 NT vs LMB**

|                                           | Data Set-A             |
|-------------------------------------------|------------------------|
| Table Analyzed                            | Data 1                 |
| Column E                                  | Cherry-dTIS11 NT       |
| vs                                        | vs                     |
| Column F                                  | Cherry-dTIS11 +LMB     |
| Mann Whitney test                         |                        |
| P value                                   | < 0.0001               |
| Exact or approximate P value?             | Gaussian Approximation |
| P value summary                           | ***                    |
| Are medians signif. different? (P < 0.05) | Yes                    |
| One- or two-tailed P value?               | Two-tailed             |
| Sum of ranks in column E,F                | 561 , 1584             |
| Mann-Whitney U                            | 0.0000                 |

---

**Cherry-dTIS11 NT vs NaN3**

|                | Data Set-A |
|----------------|------------|
| Table Analyzed | Data 1     |



|                                           |                        |
|-------------------------------------------|------------------------|
| Column E                                  | Cherry-dTIS11 NT       |
| vs                                        | vs                     |
| Column G                                  | Cherry-dTIS11 +NaN3    |
| Mann Whitney test                         |                        |
| P value                                   | < 0.0001               |
| Exact or approximate P value?             | Gaussian Approximation |
| P value summary                           | ***                    |
| Are medians signif. different? (P < 0.05) | Yes                    |
| One- or two-tailed P value?               | Two-tailed             |
| Sum of ranks in column E,G                | 682 , 1463             |
| Mann-Whitney U                            | 121.0                  |

---

**Cherry-dTIS11 NT vs NaN3+LMB**

|                                           | Data Set-A             |
|-------------------------------------------|------------------------|
| Table Analyzed                            | Data 1                 |
| Column E                                  | Cherry-dTIS11 NT       |
| vs                                        | vs                     |
| Column H                                  | Cherry-dTIS1 +LMB+NaN3 |
| Mann Whitney test                         |                        |
| P value                                   | < 0.0001               |
| Exact or approximate P value?             | Gaussian Approximation |
| P value summary                           | ***                    |
| Are medians signif. different? (P < 0.05) | Yes                    |
| One- or two-tailed P value?               | Two-tailed             |
| Sum of ranks in column E,H                | 653 , 1492             |
| Mann-Whitney U                            | 92.00                  |

---

**Cherry-dTIS11 NaN3 vs NaN3+LMB**

|                                           | Data Set-A             |
|-------------------------------------------|------------------------|
| Table Analyzed                            | Data 1                 |
| Column G                                  | Cherry-dTIS11 +NaN3    |
| vs                                        | vs                     |
| Column H                                  | Cherry-dTIS1 +LMB+NaN3 |
| Mann Whitney test                         |                        |
| P value                                   | 0.7831                 |
| Exact or approximate P value?             | Gaussian Approximation |
| P value summary                           | ns                     |
| Are medians signif. different? (P < 0.05) | No                     |
| One- or two-tailed P value?               | Two-tailed             |
| Sum of ranks in column G,H                | 1019 , 1061            |
| Mann-Whitney U                            | 491.0                  |

---

# Figure 4B - Raw data

This file can be opened by [GraphPad Prism](#) (version 5.00 or later).

This file contains 1 data tables and 0 info tables:

- [Data 1](#)

Data 1

| Cherry NT | Cherry +LMB | Cherry-dTIS11 WT NT | Cherry-dTIS11 WT +LMB | delta131-213 NT | delta131-213 +LMB | C150A NT | C150A +LMB | C156A NT | C156A +LMB | C179A NT | C179A +LMB | C188A NT | C188A +LMB | C194A NT | C194A +LMB | C156A C179A NT | C156A C179A +LMB |
|-----------|-------------|---------------------|-----------------------|-----------------|-------------------|----------|------------|----------|------------|----------|------------|----------|------------|----------|------------|----------------|------------------|
| 1.79      | 1.77        | 1                   | 1.68                  | 0.99            | 1.85              | 0.59     | 2.11       | 0.85     | 2.08       | 0.66     | 2.13       | 0.81     | 2.5        | 0.79     | 3.15       | 0.76           | 5.89             |
| 1.78      | 1.81        | 0.6                 | 1.84                  | 0.85            | 1.43              | 0.65     | 1.74       | 0.85     | 2.35       | 0.87     | 2.98       | 0.94     | 2.72       | 0.87     | 3.63       | 0.85           | 4.54             |
| 1.42      | 1.53        | 0.93                | 2.4                   | 0.9             | 1.76              | 0.83     | 1.97       | 0.95     | 1.98       | 0.76     | 3.4        | 0.88     | 2.66       | 0.82     | 3.33       | 0.9            | 2.94             |
| 1.54      | 1.68        | 0.83                | 2                     | 0.9             | 1.74              | 1.01     | 1.69       | 0.75     | 1.89       | 0.83     | 3.53       | 0.73     | 2.98       | 0.9      | 3.92       | 0.79           | 4.58             |
| 1.85      | 1.79        | 0.82                | 2.35                  | 1.1             | 1.95              | 0.93     | 1.82       | 0.81     | 2.4        | 0.71     | 2.96       | 0.76     | 4.42       | 0.69     | 2.72       | 0.9            | 5.28             |
| 1.7       | 1.81        | 0.84                | 1.89                  | 0.76            | 1.93              | 0.73     | 1.78       | 0.93     | 2.82       | 0.75     | 3.04       | 0.54     | 3.75       | 0.86     | 3.83       | 0.83           | 3.31             |
| 1.55      | 1.52        | 0.72                | 2.36                  | 0.71            | 1.49              | 0.83     | 3.14       | 0.92     | 2.83       | 0.86     | 3.47       | 0.88     | 6.04       | 0.85     | 2.36       | 0.83           | 3.19             |
| 1.52      | 1.94        | 0.69                | 1.86                  | 0.59            | 1.65              | 0.61     | 2.58       | 0.76     | 1.82       | 0.81     | 2.63       | 0.92     | 6.85       | 0.74     | 5.01       | 0.84           | 3.49             |
| 1.63      | 1.44        | 0.67                | 2.16                  | 0.8             | 1.88              | 0.93     | 1.72       | 0.99     | 2.14       | 0.66     | 3.87       | 0.74     | 2.86       | 0.75     | 5.54       | 0.78           | 3.74             |
| 1.71      | 2.03        | 0.75                | 2.02                  | 0.8             | 2.11              | 0.68     | 2.01       | 0.87     | 2          | 0.79     | 4.02       | 0.65     | 5.53       | 0.8      | 2.72       | 0.75           | 2.48             |
| 1.4       | 1.79        | 0.75                | 2.28                  | 0.59            | 2.05              | 0.72     | 2.41       | 0.68     | 1.93       | 0.88     | 3.21       | 0.88     | 2.54       | 0.71     | 5.55       | 0.96           | 2.51             |
| 1.74      | 1.81        | 0.96                | 2.22                  | 0.96            | 1.67              | 0.73     | 2.13       | 0.85     | 2.23       | 0.82     | 3.59       | 0.57     | 4.01       | 0.91     | 6.47       | 0.85           | 3.05             |
| 1.91      | 1.57        | 0.86                | 2.39                  | 0.94            | 1.61              | 0.74     | 1.98       | 0.72     | 2.06       | 0.81     | 3.67       | 0.8      | 3.33       | 0.67     | 6.04       | 0.93           | 3.21             |
| 1.84      | 1.62        | 0.46                | 2.56                  | 0.83            | 1.88              | 0.85     | 2.34       | 0.87     | 1.91       | 0.81     | 3.83       | 0.81     | 2.42       | 0.66     | 2.56       | 0.9            | 5.75             |
| 2.08      | 1.4         | 0.85                | 1.89                  | 0.89            | 1.73              | 0.82     | 2.27       | 0.48     | 1.89       | 0.82     | 3.65       | 0.78     | 2.05       | 0.85     | 2.84       | 1.01           | 4.81             |
| 1.49      | 1.76        | 0.91                | 2.12                  | 0.76            | 1.66              | 0.91     | 2.2        | 0.91     | 2.04       | 0.79     | 3.61       | 0.87     | 4.07       | 0.85     | 3.44       | 0.7            | 2.82             |
| 1.53      | 1.61        | 0.89                | 1.77                  | 0.92            | 1.82              | 0.76     | 2.02       | 0.67     | 2.11       | 0.81     | 3.19       | 0.71     | 5.84       | 0.9      | 3.03       | 0.82           | 2.7              |
| 1.68      | 1.88        | 0.91                | 1.79                  | 0.65            | 1.75              | 0.83     | 2.28       | 0.76     | 2.23       | 0.62     | 3.91       | 0.78     | 2.72       | 0.63     | 3.44       | 0.77           | 2.96             |
| 1.57      | 1.8         | 0.75                | 2.06                  | 0.86            | 1.9               | 0.82     | 1.98       | 0.68     | 2.25       | 0.96     | 4.19       | 0.92     | 3.03       | 0.76     | 4.72       | 0.64           | 3.79             |
| 1.56      | 1.73        | 0.66                | 2.1                   | 0.77            | 1.53              | 0.85     | 1.31       | 0.87     | 2.16       | 0.95     | 3.91       | 0.76     | 4.09       | 0.8      | 3.22       | 0.97           | 3.37             |
| 1.69      | 1.59        | 0.76                | 2.18                  | 0.75            | 1.73              | 0.81     | 2.17       | 0.84     | 2.36       | 0.8      | 2.46       | 0.93     | 2.79       | 0.8      | 4.57       | 0.75           | 3.39             |
| 1.53      | 1.45        | 0.83                | 2.8                   | 0.78            | 1.81              | 0.85     | 2.41       | 0.76     | 2.61       | 0.97     | 2.77       | 0.91     | 3.55       | 0.58     | 3.55       | 0.84           | 3.69             |
| 1.68      | 1.9         | 0.74                | 2.14                  | 0.91            | 1.72              | 0.76     | 2.37       | 0.79     | 2.45       | 0.82     | 3.41       | 0.94     | 6.34       | 0.72     | 4.9        | 0.85           | 5.36             |
| 1.63      | 1.7         | 0.74                | 2.38                  | 0.96            | 1.85              | 0.9      | 2.12       | 0.7      | 1.97       | 0.81     | 2.73       | 0.86     | 6.27       | 0.92     | 1.7        | 0.76           | 4.57             |
| 1.66      | 1.72        | 0.65                | 1.43                  | 0.88            | 1.73              | 0.91     | 2.18       | 0.66     | 1.76       | 0.91     | 2.45       | 0.9      | 5.61       | 0.71     | 2.07       | 0.86           | 2.89             |
| 1.34      | 1.65        | 0.62                | 2.15                  | 0.63            | 1.53              | 0.92     | 2.04       | 0.96     | 2.24       | 0.82     | 4.15       | 0.82     | 4.79       | 0.82     | 4.65       | 0.66           | 3.67             |
| 1.69      | 1.5         | 0.6                 | 2.02                  | 0.72            | 1.49              | 0.72     | 2.2        | 0.77     | 2.52       | 0.8      | 4.11       | 0.92     | 4.66       | 0.78     | 4.59       | 0.76           | 5.7              |
| 1.49      | 1.62        | 0.71                | 1.87                  | 0.88            | 1.9               | 0.94     | 2.64       | 0.82     | 2.11       | 0.83     | 2.72       | 1.08     | 3.33       | 0.86     | 9.23       | 0.8            | 3.14             |
| 1.62      | 1.78        | 0.89                | 2.09                  | 0.74            | 1.73              | 0.85     | 2.08       | 0.8      | 1.63       | 0.79     | 2.46       | 0.92     | 3.79       | 0.74     | 2.75       | 0.88           | 2.44             |
| 1.78      | 1.67        | 0.93                | 2.19                  | 0.9             | 1.72              | 0.82     | 2          | 0.81     | 2.43       | 0.91     | 2.72       | 0.9      | 3.69       | 0.85     | 5.08       | 0.82           | 5.5              |
|           | 1.7         |                     | 2.4                   |                 |                   |          | 2.37       | 0.84     |            | 0.77     | 2.35       |          | 4.17       |          | 4.48       | 0.8            | 5.2              |
|           | 1.93        |                     | 2.08                  |                 |                   |          | 2.64       |          |            |          |            |          | 4.82       |          | 3.81       |                | 3.54             |
|           | 1.63        |                     | 2.42                  |                 |                   |          | 2.3        |          |            |          |            |          | 4.78       |          | 4.46       |                |                  |
|           |             |                     | 2.11                  |                 |                   |          | 2.2        |          |            |          |            |          | 4.59       |          | 2.79       |                |                  |
|           |             |                     | 2.26                  |                 |                   |          |            |          |            |          |            |          | 4.3        |          | 2.74       |                |                  |
|           |             |                     |                       |                 |                   |          |            |          |            |          |            |          | 5.81       |          |            |                |                  |

Fig 4B Dot plot

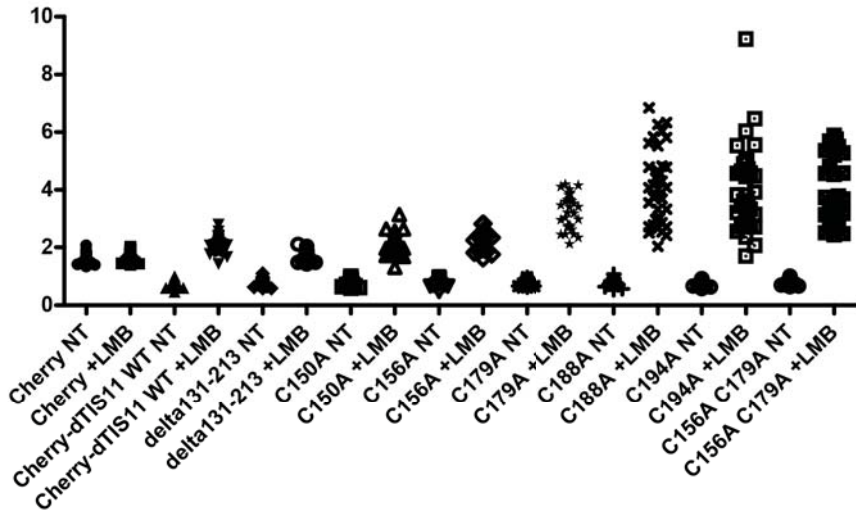

Fig 4B Mean +SD

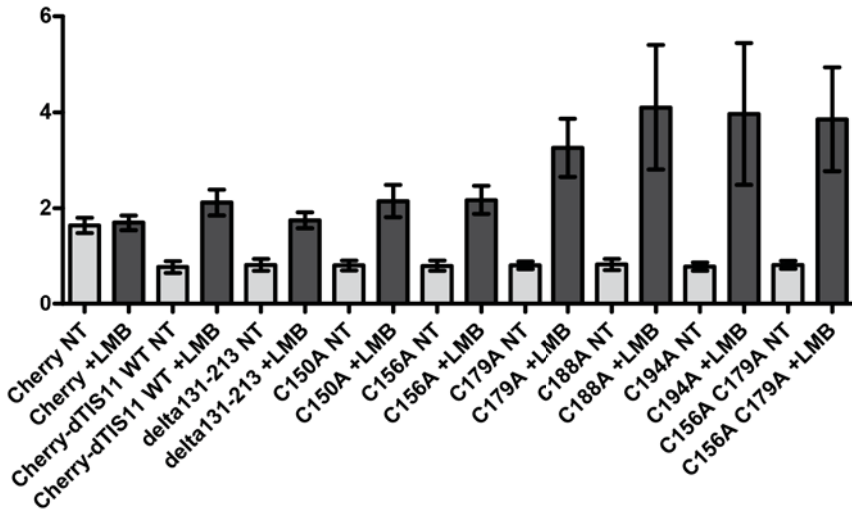

Fig 4B Mean +SEM

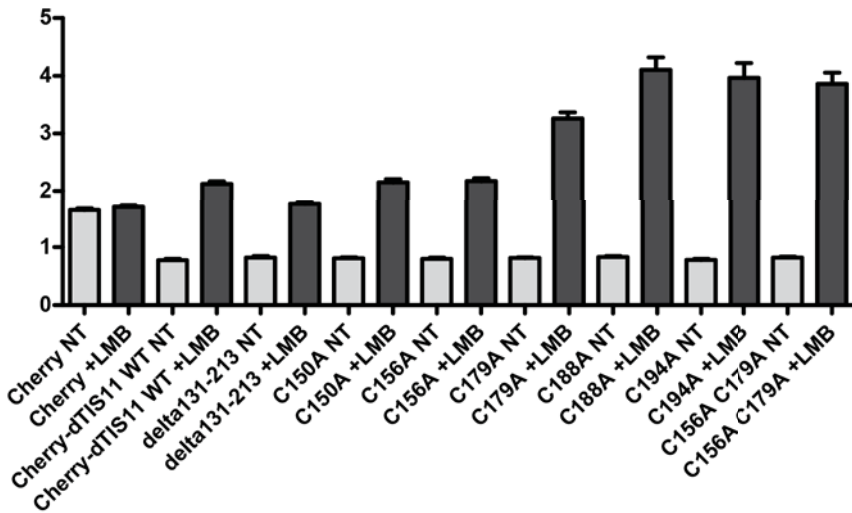

# Figure 4B - Statistical analysis

This file can be opened by [GraphPad Prism](#) (version 5.00 or later).

This file contains 10 data tables and 0 info tables:

- [Col Stats of Data 1](#)
- [Cherry +LMB vs Cherry-dTIS11 WT +LMB](#)
- [WT +LMB vs delta131-213 +LMB](#)
- [Cherry +LMB vs delta131-213 +LMB](#)
- [WT +LMB vs C150A +LMB](#)
- [WT +LMB vs C156A +LMB](#)
- [WT +LMB vs C179A +LMB](#)
- [WT +LMB vs C188A +LMB](#)
- [WT +LMB vs C194A +LMB](#)
- [WT +LMB vs C156A C179A +LMB](#)

## Col Stats of Data 1

|                                     | Cherry NT | Cherry +LMB | Cherry-dTIS11 WT NT | Cherry-dTIS11 WT +LMB | delta131-213 NT | delta131-213 +LMB | C150A NT | C150A +LMB | C156A NT | C156A +LMB | C179A NT | C179A +LMB | C188A NT | C188A +LMB | C194/ NT |
|-------------------------------------|-----------|-------------|---------------------|-----------------------|-----------------|-------------------|----------|------------|----------|------------|----------|------------|----------|------------|----------|
| Number of values                    | 30        | 33          | 30                  | 35                    | 30              | 30                | 30       | 34         | 31       | 30         | 31       | 31         | 30       | 36         | 30       |
| Minimum                             | 1.340     | 1.400       | 0.4600              | 1.430                 | 0.5900          | 1.430             | 0.5900   | 1.310      | 0.4800   | 1.630      | 0.6200   | 2.130      | 0.5400   | 2.050      | 0.5800   |
| 25% Percentile                      | 1.530     | 1.600       | 0.6850              | 1.890                 | 0.7475          | 1.658             | 0.7300   | 1.980      | 0.7500   | 1.960      | 0.7900   | 2.720      | 0.7600   | 2.890      | 0.7175   |
| Median                              | 1.645     | 1.700       | 0.7550              | 2.120                 | 0.8400          | 1.735             | 0.8250   | 2.150      | 0.8100   | 2.125      | 0.8100   | 3.400      | 0.8650   | 4.040      | 0.8000   |
| 75% Percentile                      | 1.750     | 1.805       | 0.8900              | 2.350                 | 0.9025          | 1.880             | 0.9025   | 2.348      | 0.8700   | 2.370      | 0.8600   | 3.830      | 0.9200   | 4.813      | 0.8525   |
| Maximum                             | 2.080     | 2.030       | 1.000               | 2.800                 | 1.100           | 2.110             | 1.010    | 3.140      | 0.9900   | 2.830      | 0.9700   | 4.190      | 1.080    | 6.850      | 0.9200   |
| Mean                                | 1.647     | 1.701       | 0.7773              | 2.122                 | 0.8240          | 1.753             | 0.8100   | 2.153      | 0.8039   | 2.173      | 0.8129   | 3.262      | 0.8303   | 4.103      | 0.7863   |
| Std. Deviation                      | 0.1606    | 0.1531      | 0.1265              | 0.2699                | 0.1216          | 0.1641            | 0.1023   | 0.3331     | 0.1073   | 0.2921     | 0.08162  | 0.6049     | 0.1157   | 1.298      | 0.0879   |
| Std. Error                          | 0.02932   | 0.02666     | 0.02310             | 0.04562               | 0.02220         | 0.02996           | 0.01868  | 0.05712    | 0.01928  | 0.05333    | 0.01466  | 0.1086     | 0.02113  | 0.2163     | 0.0160   |
| Lower 95% CI of mean                | 1.587     | 1.647       | 0.7301              | 2.029                 | 0.7786          | 1.692             | 0.7718   | 2.037      | 0.7645   | 2.064      | 0.7830   | 3.040      | 0.7871   | 3.664      | 0.7535   |
| Upper 95% CI of mean                | 1.707     | 1.755       | 0.8246              | 2.214                 | 0.8694          | 1.815             | 0.8482   | 2.269      | 0.8432   | 2.282      | 0.8428   | 3.484      | 0.8736   | 4.542      | 0.8192   |
| KS normality test                   |           |             |                     |                       |                 |                   |          |            |          |            |          |            |          |            |          |
| KS distance                         | 0.08348   | 0.08662     | 0.09869             | 0.07742               | 0.1108          | 0.1195            | 0.1389   | 0.1150     | 0.08341  | 0.09648    | 0.1637   | 0.1145     | 0.1384   | 0.1014     | 0.1322   |
| P value                             | > 0.10    | > 0.10      | > 0.10              | > 0.10                | > 0.10          | > 0.10            | > 0.10   | > 0.10     | > 0.10   | > 0.10     | 0.0337   | > 0.10     | > 0.10   | > 0.10     | > 0.10   |
| Passed normality test (alpha=0.05)? | Yes       | Yes         | Yes                 | Yes                   | Yes             | Yes               | Yes      | Yes        | Yes      | Yes        | No       | Yes        | Yes      | Yes        | Yes      |
| P value summary                     | ns        | ns          | ns                  | ns                    | ns              | ns                | ns       | ns         | ns       | ns         | *        | ns         | ns       | ns         | ns       |
| Sum                                 | 49.40     | 56.13       | 23.32               | 74.26                 | 24.72           | 52.60             | 24.30    | 73.20      | 24.92    | 65.20      | 25.20    | 101.1      | 24.91    | 147.7      | 23.59    |

## Cherry +LMB vs Cherry-dTIS11 WT +LMB

|                                           | Data Set-A             |
|-------------------------------------------|------------------------|
| Table Analyzed                            | Data 1                 |
| Column B                                  | Cherry +LMB            |
| vs                                        | vs                     |
| Column D                                  | Cherry-dTIS11 WT +LMB  |
| Mann Whitney test                         |                        |
| P value                                   | < 0.0001               |
| Exact or approximate P value?             | Gaussian Approximation |
| P value summary                           | ***                    |
| Are medians signif. different? (P < 0.05) | Yes                    |
| One- or two-tailed P value?               | Two-tailed             |
| Sum of ranks in column B,D                | 660 , 1686             |
| Mann-Whitney U                            | 99.00                  |

## WT +LMB vs delta131-213 +LMB

|                                           | Data Set-A             |
|-------------------------------------------|------------------------|
| Table Analyzed                            | Data 1                 |
| Column D                                  | Cherry-dTIS11 WT +LMB  |
| vs                                        | vs                     |
| Column F                                  | delta131-213 +LMB      |
| Mann Whitney test                         |                        |
| P value                                   | < 0.0001               |
| Exact or approximate P value?             | Gaussian Approximation |
| P value summary                           | ***                    |
| Are medians signif. different? (P < 0.05) | Yes                    |
| One- or two-tailed P value?               | Two-tailed             |
| Sum of ranks in column D,F                | 1557 , 588             |
| Mann-Whitney U                            | 123.0                  |

**Cherry +LMB vs delta131-213 +LMB**

|                                           | Data Set-A             |
|-------------------------------------------|------------------------|
| Table Analyzed                            | Data 1                 |
| Column B                                  | Cherry +LMB            |
| vs                                        | vs                     |
| Column F                                  | delta131-213 +LMB      |
| Mann Whitney test                         |                        |
| P value                                   | 0.2077                 |
| Exact or approximate P value?             | Gaussian Approximation |
| P value summary                           | ns                     |
| Are medians signif. different? (P < 0.05) | No                     |
| One- or two-tailed P value?               | Two-tailed             |
| Sum of ranks in column B,F                | 964 , 1052             |
| Mann-Whitney U                            | 403.0                  |

**WT +LMB vs C150A +LMB**

|                                           | Data Set-A             |
|-------------------------------------------|------------------------|
| Table Analyzed                            | Data 1                 |
| Column D                                  | Cherry-dTIS11 WT +LMB  |
| vs                                        | vs                     |
| Column H                                  | C150A +LMB             |
| Mann Whitney test                         |                        |
| P value                                   | 0.7779                 |
| Exact or approximate P value?             | Gaussian Approximation |
| P value summary                           | ns                     |
| Are medians signif. different? (P < 0.05) | No                     |
| One- or two-tailed P value?               | Two-tailed             |
| Sum of ranks in column D,H                | 1201 , 1214            |
| Mann-Whitney U                            | 571.0                  |

**WT +LMB vs C156A +LMB**

|                                           | Data Set-A             |
|-------------------------------------------|------------------------|
| Table Analyzed                            | Data 1                 |
| Column D                                  | Cherry-dTIS11 WT +LMB  |
| vs                                        | vs                     |
| Column J                                  | C156A +LMB             |
| Mann Whitney test                         |                        |
| P value                                   | 0.6262                 |
| Exact or approximate P value?             | Gaussian Approximation |
| P value summary                           | ns                     |
| Are medians signif. different? (P < 0.05) | No                     |
| One- or two-tailed P value?               | Two-tailed             |
| Sum of ranks in column D,J                | 1118 , 1028            |
| Mann-Whitney U                            | 487.5                  |

**WT +LMB vs C179A +LMB**

|                                           | Data Set-A             |
|-------------------------------------------|------------------------|
| Table Analyzed                            | Data 1                 |
| Column D                                  | Cherry-dTIS11 WT +LMB  |
| vs                                        | vs                     |
| Column L                                  | C179A +LMB             |
| Mann Whitney test                         |                        |
| P value                                   | < 0.0001               |
| Exact or approximate P value?             | Gaussian Approximation |
| P value summary                           | ***                    |
| Are medians signif. different? (P < 0.05) | Yes                    |
| One- or two-tailed P value?               | Two-tailed             |
| Sum of ranks in column D,L                | 666.5 , 1545           |
| Mann-Whitney U                            | 36.50                  |

**WT +LMB vs C188A +LMB**

|                                           | Data Set-A             |
|-------------------------------------------|------------------------|
| Table Analyzed                            | Data 1                 |
| Column D                                  | Cherry-dTIS11 WT +LMB  |
| vs                                        | vs                     |
| Column N                                  | C188A +LMB             |
| Mann Whitney test                         |                        |
| P value                                   | < 0.0001               |
| Exact or approximate P value?             | Gaussian Approximation |
| P value summary                           | ***                    |
| Are medians signif. different? (P < 0.05) | Yes                    |
| One- or two-tailed P value?               | Two-tailed             |

|                            |              |
|----------------------------|--------------|
| Sum of ranks in column D,N | 663.5 , 1893 |
| Mann-Whitney U             | 33.50        |

**WT +LMB vs C194A +LMB**

|                                           | Data Set-A             |
|-------------------------------------------|------------------------|
| Table Analyzed                            | Data 1                 |
| Column D                                  | Cherry-dTIS11 WT +LMB  |
| vs                                        |                        |
| Column P                                  | C194A +LMB             |
| Mann Whitney test                         |                        |
| P value                                   | < 0.0001               |
| Exact or approximate P value?             | Gaussian Approximation |
| P value summary                           | ***                    |
| Are medians signif. different? (P < 0.05) | Yes                    |
| One- or two-tailed P value?               | Two-tailed             |
| Sum of ranks in column D,P                | 699 , 1786             |
| Mann-Whitney U                            | 69.00                  |

**WT +LMB vs C156A C179A +LMB**

|                                           | Data Set-A             |
|-------------------------------------------|------------------------|
| Table Analyzed                            | Data 1                 |
| Column D                                  | Cherry-dTIS11 WT +LMB  |
| vs                                        |                        |
| Column R                                  | C156A C179A +LMB       |
| Mann Whitney test                         |                        |
| P value                                   | < 0.0001               |
| Exact or approximate P value?             | Gaussian Approximation |
| P value summary                           | ***                    |
| Are medians signif. different? (P < 0.05) | Yes                    |
| One- or two-tailed P value?               | Two-tailed             |
| Sum of ranks in column D,R                | 637 , 1641             |
| Mann-Whitney U                            | 7.000                  |

## Figure 4D - Raw data

This file can be opened by [GraphPad Prism](#) (version 5.00 or later).

This file contains 1 data tables and 0 info tables:

- [Data 1](#)

### Data 1

| Cherry | Cherry-dTIS11 114-240 WT | Cherry-dTIS11 114-240 C179A |
|--------|--------------------------|-----------------------------|
| 1,261  | 1,635                    | 2,179                       |
| 1,889  | 1,294                    | 2,532                       |
| 1,453  | 1,575                    | 2,363                       |
| 1,572  | 1,483                    | 2,088                       |
| 2,298  | 1,611                    | 1,879                       |
| 2,175  | 1,552                    | 1,784                       |
| 1,829  | 1,623                    | 1,595                       |
| 1,893  | 1,968                    | 1,925                       |
| 1,375  | 1,532                    | 2,434                       |
| 1,741  | 1,425                    | 1,636                       |
| 1,66   | 1,612                    | 3,185                       |
| 1,536  | 1,641                    | 1,939                       |
| 1,679  | 2,135                    | 2,13                        |
| 1,579  | 1,707                    | 1,896                       |
| 1,57   | 2,607                    | 2,715                       |
| 1,591  | 1,719                    | 2,773                       |
| 2,103  | 1,744                    | 2,093                       |
| 1,932  | 1,947                    | 1,986                       |
| 1,76   | 1,738                    | 1,804                       |
| 1,953  | 1,387                    | 2,853                       |
| 1,665  | 1,707                    | 2,915                       |
| 1,488  | 1,746                    | 2,265                       |
| 1,773  | 1,719                    | 1,929                       |
| 1,866  | 1,824                    | 2,058                       |
| 2,016  | 1,637                    | 1,969                       |
| 1,562  | 2,019                    | 2,595                       |
| 1,629  | 1,491                    | 1,714                       |
| 2,157  | 1,439                    | 1,419                       |
| 1,721  | 1,363                    | 2,046                       |
| 2,863  | 1,567                    | 2,114                       |
| 2,353  | 1,519                    | 2,557                       |
| 1,328  | 1,292                    | 2,47                        |
| 1,778  | 1,479                    | 2,554                       |
| 1,796  | 1,54                     | 1,815                       |
| 2,031  | 1,492                    | 2,124                       |

Fig 4D Dot plot

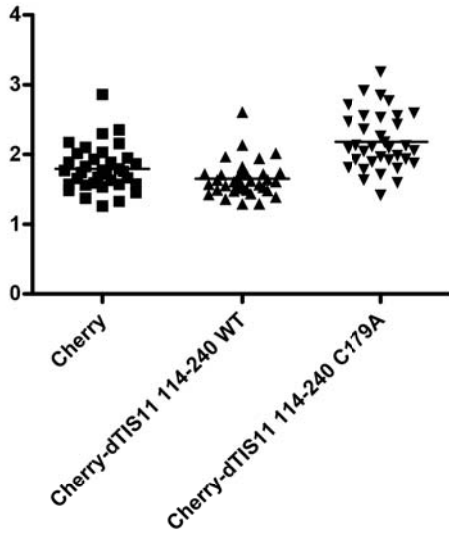

Fig 4D Mean +SD

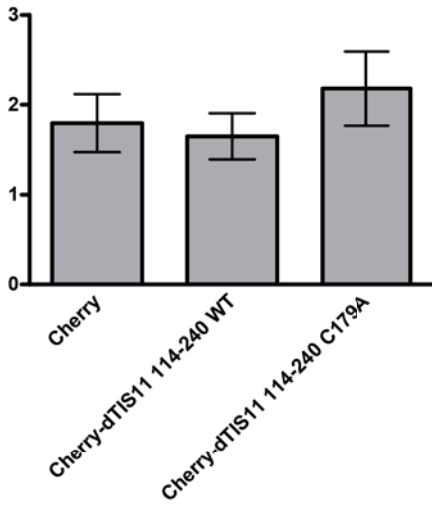

Fig 4D Mean +SEM

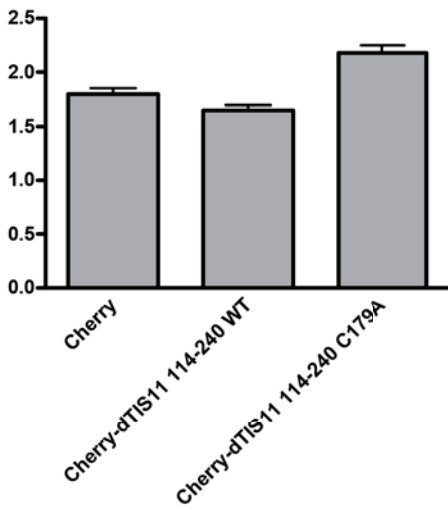



## Figure 4D - Statistical analysis

This file can be opened by [GraphPad Prism](#) (version 5.00 or later).

This file contains 3 data tables and 0 info tables:

- [Col Stats of Data 1](#)
- [Cherry vs Cherry-dTIS11 114-240 WT](#)
- [Cherry vs Cherry-dTIS11 114-240 C179A](#)

### Col Stats of Data 1

|                                     | Cherry  | Cherry-dTIS11<br>114-240 WT | Cherry-dTIS11<br>114-240 C179A |
|-------------------------------------|---------|-----------------------------|--------------------------------|
| Number of values                    | 35      | 35                          | 35                             |
| Minimum                             | 1.261   | 1.292                       | 1.419                          |
| 25% Percentile                      | 1.572   | 1.491                       | 1.896                          |
| Median                              | 1.760   | 1.612                       | 2.093                          |
| 75% Percentile                      | 1.953   | 1.738                       | 2.532                          |
| Maximum                             | 2.863   | 2.607                       | 3.185                          |
| Mean                                | 1.796   | 1.651                       | 2.181                          |
| Std. Deviation                      | 0.3225  | 0.2559                      | 0.4121                         |
| Std. Error                          | 0.05451 | 0.04326                     | 0.06965                        |
| Lower 95% CI of mean                | 1.686   | 1.563                       | 2.039                          |
| Upper 95% CI of mean                | 1.907   | 1.738                       | 2.322                          |
| KS normality test                   |         |                             |                                |
| KS distance                         | 0.1005  | 0.1832                      | 0.1492                         |
| P value                             | > 0.10  | 0.0044                      | 0.0469                         |
| Passed normality test (alpha=0.05)? | Yes     | No                          | No                             |
| P value summary                     | ns      | **                          | *                              |
| Sum                                 | 62.88   | 57.77                       | 76.33                          |

### Cherry vs Cherry-dTIS11 114-240 WT

|                                           | Data Set-A               |
|-------------------------------------------|--------------------------|
| Table Analyzed                            | Data 1                   |
| Column A                                  | Cherry                   |
| vs                                        | vs                       |
| Column B                                  | Cherry-dTIS11 114-240 WT |
| Mann Whitney test                         |                          |
| P value                                   | 0.0200                   |
| Exact or approximate P value?             | Gaussian Approximation   |
| P value summary                           | *                        |
| Are medians signif. different? (P < 0.05) | Yes                      |

|                             |             |
|-----------------------------|-------------|
| One- or two-tailed P value? | Two-tailed  |
| Sum of ranks in column A,B  | 1441 , 1044 |
| Mann-Whitney U              | 414.0       |

---

**Cherry vs Cherry-dTIS11 114-240 C179A**

|                                           | Data Set-A                  |
|-------------------------------------------|-----------------------------|
| Table Analyzed                            | Data 1                      |
| Column A                                  | Cherry                      |
| vs                                        | vs                          |
| Column C                                  | Cherry-dTIS11 114-240 C179A |
| Mann Whitney test                         |                             |
| P value                                   | < 0.0001                    |
| Exact or approximate P value?             | Gaussian Approximation      |
| P value summary                           | ***                         |
| Are medians signif. different? (P < 0.05) | Yes                         |
| One- or two-tailed P value?               | Two-tailed                  |
| Sum of ranks in column A,C                | 894 , 1591                  |
| Mann-Whitney U                            | 264.0                       |

---



Fig 5C Dot plot

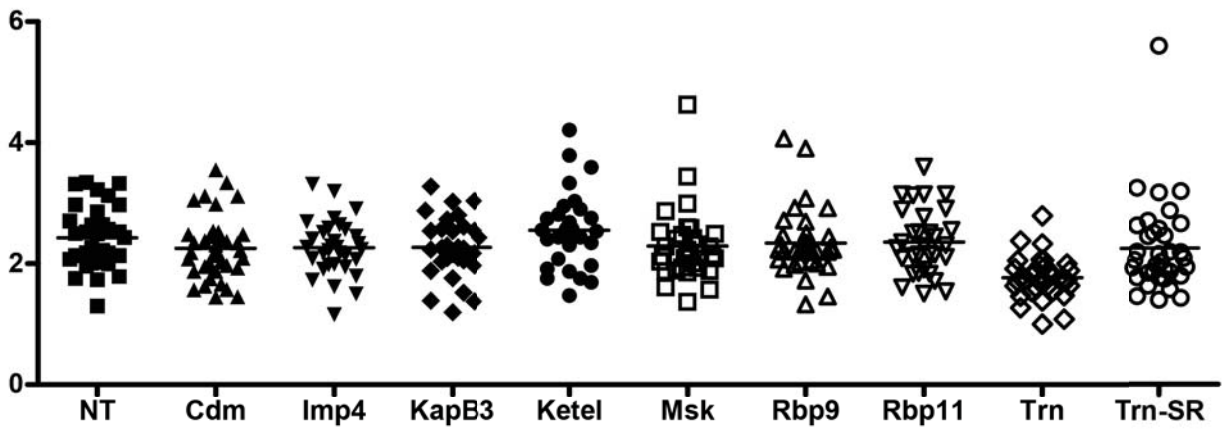

Fig 5C Mean +SD

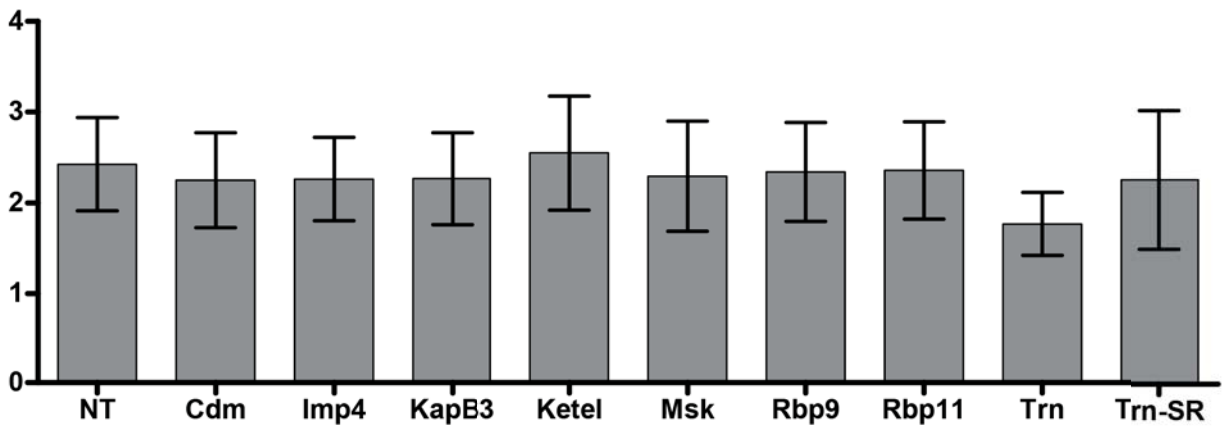

Fig 5C Mean +SEM

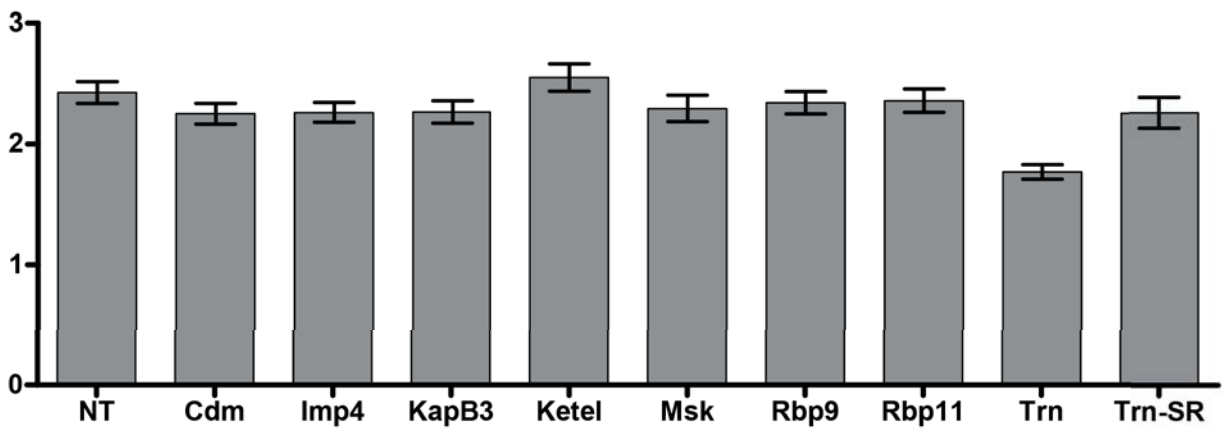

# Figure 5C - Statistical analysis

This file can be opened by [GraphPad Prism](#) (version 5.00 or later).

This file contains 10 data tables and 0 info tables:

- [Col Stats of Data 1](#)
- [NT vs Ketel](#)
- [NT vs Cdm](#)
- [NT vs Imp4](#)
- [NT vs KapB3](#)
- [NT vs Trn](#)
- [NT vs Trn-SR](#)
- [NT vs Msk](#)
- [NT vs Rbp9](#)
- [NT vs Rbp11](#)

## Col Stats of Data 1

|                                     | NT      | Cdm     | Imp4    | KapB3   | Ketel  | Msk    | Rbp9    | Rbp11   | Trn     | Trn-SR |
|-------------------------------------|---------|---------|---------|---------|--------|--------|---------|---------|---------|--------|
| Number of values                    | 33      | 37      | 32      | 30      | 30     | 31     | 35      | 31      | 34      | 35     |
| Minimum                             | 1.299   | 1.446   | 1.159   | 1.198   | 1.471  | 1.374  | 1.326   | 1.508   | 1.003   | 1.398  |
| 25% Percentile                      | 2.047   | 1.901   | 1.984   | 2.019   | 2.053  | 1.933  | 2.054   | 1.906   | 1.578   | 1.800  |
| Median                              | 2.430   | 2.184   | 2.257   | 2.256   | 2.520  | 2.141  | 2.232   | 2.295   | 1.752   | 2.055  |
| 75% Percentile                      | 2.781   | 2.482   | 2.558   | 2.581   | 2.835  | 2.492  | 2.466   | 2.780   | 1.961   | 2.580  |
| Maximum                             | 3.344   | 3.553   | 3.318   | 3.278   | 4.208  | 4.627  | 4.069   | 3.601   | 2.791   | 5.600  |
| Mean                                | 2.426   | 2.251   | 2.262   | 2.267   | 2.550  | 2.294  | 2.341   | 2.359   | 1.769   | 2.255  |
| Std. Deviation                      | 0.5149  | 0.5236  | 0.4582  | 0.5072  | 0.6273 | 0.6061 | 0.5466  | 0.5358  | 0.3487  | 0.7648 |
| Std. Error                          | 0.08964 | 0.08607 | 0.08099 | 0.09261 | 0.1145 | 0.1089 | 0.09240 | 0.09623 | 0.05980 | 0.1293 |
| Lower 95% CI of mean                | 2.243   | 2.076   | 2.097   | 2.078   | 2.316  | 2.072  | 2.153   | 2.163   | 1.647   | 1.992  |
| Upper 95% CI of mean                | 2.608   | 2.426   | 2.428   | 2.457   | 2.784  | 2.516  | 2.529   | 2.556   | 1.891   | 2.518  |
| KS normality test                   |         |         |         |         |        |        |         |         |         |        |
| KS distance                         | 0.1074  | 0.1316  | 0.06664 | 0.09018 | 0.1131 | 0.1773 | 0.2020  | 0.09717 | 0.1065  | 0.1888 |
| P value                             | > 0.10  | > 0.10  | > 0.10  | > 0.10  | > 0.10 | 0.0142 | 0.0009  | > 0.10  | > 0.10  | 0.0028 |
| Passed normality test (alpha=0.05)? | Yes     | Yes     | Yes     | Yes     | Yes    | No     | No      | Yes     | Yes     | No     |
| P value summary                     | ns      | ns      | ns      | ns      | ns     | *      | ***     | ns      | ns      | **     |
| Geometric mean                      | 2.371   | 2.194   | 2.215   | 2.207   | 2.478  | 2.231  | 2.286   | 2.301   | 1.735   | 2.162  |
| Lower 95% CI of geo. mean           | 2.194   | 2.034   | 2.050   | 2.016   | 2.262  | 2.048  | 2.120   | 2.117   | 1.616   | 1.964  |
| Upper 95% CI of geo. mean           | 2.563   | 2.368   | 2.393   | 2.417   | 2.714  | 2.429  | 2.464   | 2.501   | 1.862   | 2.379  |
| Sum                                 | 80.05   | 83.29   | 72.40   | 68.02   | 76.50  | 71.12  | 81.94   | 73.13   | 60.14   | 78.92  |

## NT vs Ketel

|                               | Data Set-A             |
|-------------------------------|------------------------|
| Table Analyzed                | Data 1                 |
| Column A                      | NT                     |
| vs                            | vs                     |
| Column E                      | Ketel                  |
| Mann Whitney test             |                        |
| P value                       | 0.5222                 |
| Exact or approximate P value? | Gaussian Approximation |

|                                           |             |
|-------------------------------------------|-------------|
| P value summary                           | ns          |
| Are medians signif. different? (P < 0.05) | No          |
| One- or two-tailed P value?               | Two-tailed  |
| Sum of ranks in column A,E                | 1009 , 1007 |
| Mann-Whitney U                            | 448.0       |

#### NT vs Cdm

|                                           | Data Set-A             |
|-------------------------------------------|------------------------|
| Table Analyzed                            | Data 1                 |
| Column A                                  | NT                     |
| vs                                        | vs                     |
| Column B                                  | Cdm                    |
| Mann Whitney test                         |                        |
| P value                                   | 0.1057                 |
| Exact or approximate P value?             | Gaussian Approximation |
| P value summary                           | ns                     |
| Are medians signif. different? (P < 0.05) | No                     |
| One- or two-tailed P value?               | Two-tailed             |
| Sum of ranks in column A,B                | 1310 , 1176            |
| Mann-Whitney U                            | 472.5                  |

#### NT vs Imp4

|                                           | Data Set-A             |
|-------------------------------------------|------------------------|
| Table Analyzed                            | Data 1                 |
| Column A                                  | NT                     |
| vs                                        | vs                     |
| Column C                                  | Imp4                   |
| Mann Whitney test                         |                        |
| P value                                   | 0.2563                 |
| Exact or approximate P value?             | Gaussian Approximation |
| P value summary                           | ns                     |
| Are medians signif. different? (P < 0.05) | No                     |
| One- or two-tailed P value?               | Two-tailed             |
| Sum of ranks in column A,C                | 1176 , 969             |
| Mann-Whitney U                            | 441.0                  |

#### NT vs KapB3

|                                           | Data Set-A             |
|-------------------------------------------|------------------------|
| Table Analyzed                            | Data 1                 |
| Column A                                  | NT                     |
| vs                                        | vs                     |
| Column D                                  | KapB3                  |
| Mann Whitney test                         |                        |
| P value                                   | 0.4208                 |
| Exact or approximate P value?             | Gaussian Approximation |
| P value summary                           | ns                     |
| Are medians signif. different? (P < 0.05) | No                     |
| One- or two-tailed P value?               | Two-tailed             |
| Sum of ranks in column A,D                | 1115 , 901             |
| Mann-Whitney U                            | 436.0                  |

---

**NT vs Trn**

|                                           | Data Set-A             |
|-------------------------------------------|------------------------|
| Table Analyzed                            | Data 1                 |
| Column A                                  | NT                     |
| vs                                        | vs                     |
| Column I                                  | Trn                    |
| Mann Whitney test                         |                        |
| P value                                   | < 0.0001               |
| Exact or approximate P value?             | Gaussian Approximation |
| P value summary                           | ***                    |
| Are medians signif. different? (P < 0.05) | Yes                    |
| One- or two-tailed P value?               | Two-tailed             |
| Sum of ranks in column A,I                | 1543 , 735             |
| Mann-Whitney U                            | 140.0                  |

---

**NT vs Trn-SR**

|                                           | Data Set-A             |
|-------------------------------------------|------------------------|
| Table Analyzed                            | Data 1                 |
| Column A                                  | NT                     |
| vs                                        | vs                     |
| Column J                                  | Trn-SR                 |
| Mann Whitney test                         |                        |
| P value                                   | 0.0503                 |
| Exact or approximate P value?             | Gaussian Approximation |
| P value summary                           | ns                     |
| Are medians signif. different? (P < 0.05) | No                     |
| One- or two-tailed P value?               | Two-tailed             |
| Sum of ranks in column A,J                | 1299 , 1048            |
| Mann-Whitney U                            | 417.5                  |

---

**NT vs Msk**

|                                           | Data Set-A             |
|-------------------------------------------|------------------------|
| Table Analyzed                            | Data 1                 |
| Column A                                  | NT                     |
| vs                                        | vs                     |
| Column F                                  | Msk                    |
| Mann Whitney test                         |                        |
| P value                                   | 0.1487                 |
| Exact or approximate P value?             | Gaussian Approximation |
| P value summary                           | ns                     |
| Are medians signif. different? (P < 0.05) | No                     |
| One- or two-tailed P value?               | Two-tailed             |
| Sum of ranks in column A,F                | 1181 , 899.5           |
| Mann-Whitney U                            | 403.5                  |

---

**NT vs Rbp9**

|                | Data Set-A |
|----------------|------------|
| Table Analyzed | Data 1     |

|                                           |                        |
|-------------------------------------------|------------------------|
| Column A<br>vs<br>Column G                | NT<br>vs<br>Rbp9       |
| Mann Whitney test                         |                        |
| P value                                   | 0.4653                 |
| Exact or approximate P value?             | Gaussian Approximation |
| P value summary                           | ns                     |
| Are medians signif. different? (P < 0.05) | No                     |
| One- or two-tailed P value?               | Two-tailed             |
| Sum of ranks in column A,G                | 1199 , 1148            |
| Mann-Whitney U                            | 517.5                  |

---

### NT vs Rbp11

|                                           | Data Set-A             |
|-------------------------------------------|------------------------|
| Table Analyzed                            | Data 1                 |
| Column A<br>vs<br>Column H                | NT<br>vs<br>Rbp11      |
| Mann Whitney test                         |                        |
| P value                                   | 0.5545                 |
| Exact or approximate P value?             | Gaussian Approximation |
| P value summary                           | ns                     |
| Are medians signif. different? (P < 0.05) | No                     |
| One- or two-tailed P value?               | Two-tailed             |
| Sum of ranks in column A,H                | 1117 , 963             |
| Mann-Whitney U                            | 467.0                  |

---



# Figure 5E - Raw data

This file can be opened by [GraphPad Prism](#) (version 5.00 or later).

This file contains 1 data tables and 0 info tables:

- [Fig 5E new](#)

**Fig 5E new**

| WT GFP | WT GFP-M9M | C150A GFP | C150A GFP-M9M | C156A GFP | C156A GFP-M9M | C179A GFP | C179A GFP-M9M | C188A GFP | C188A GFP-M9M | C194A GFP | C194A GFP-M9M |
|--------|------------|-----------|---------------|-----------|---------------|-----------|---------------|-----------|---------------|-----------|---------------|
| 2,1    | 2,15       | 2,18      | 2,06          | 2,68      | 1,3           | 2,29      | 1,8           | 3,68      | 2,1           | 2,56      | 2,13          |
| 2,38   | 1,61       | 2,29      | 2,04          | 2,4       | 1,82          | 3,91      | 2,07          | 4,21      | 2,03          | 3,36      | 2,3           |
| 1,86   | 1,77       | 1,25      | 2,26          | 2,37      | 2,34          | 2,53      | 2,56          | 3,13      | 2,12          | 4,08      | 1,97          |
| 1,83   | 1,82       | 1,47      | 2,21          | 2,59      | 1,75          | 2,1       | 2,17          | 2,93      | 2,01          | 3,8       | 1,91          |
| 1,92   | 1,86       | 1,64      | 2,31          | 2,18      | 2,35          | 2,7       | 1,61          | 4,53      | 2             | 4,29      | 1,87          |
| 1,73   | 1,48       | 2,54      | 1,79          | 2,05      | 2,76          | 3,21      | 2,57          | 2,63      | 2,38          | 4,8       | 1,99          |
| 1,86   | 1,7        | 2,33      | 1,99          | 2,01      | 3,19          | 3,5       | 1,16          | 1,55      | 2,97          | 2,09      | 2,12          |
| 1,98   | 1,59       | 1,85      | 2,09          | 2,03      | 1,67          | 4,25      | 1,68          | 4,08      | 2,24          | 3,49      | 1,59          |
| 1,88   | 1,08       | 1,81      | 1,92          | 1,99      | 2,03          | 3,46      | 2,62          | 4,81      | 2,25          | 4,15      | 2,23          |
| 1,92   | 1,65       | 2,02      | 2,62          | 1,72      | 1,91          | 3,28      | 1,72          | 2,79      | 2,07          | 3,3       | 1,88          |
| 1,55   | 2,24       | 2,15      | 2,07          | 2,37      | 2,11          | 3,76      | 1,65          | 2,72      | 1,92          | 2,34      | 2,44          |
| 1,36   | 2,07       | 1,88      | 2,23          | 2,02      | 1,89          | 2,49      | 2,36          | 3,2       | 1,92          | 4,14      | 2,52          |
| 1,84   | 2,06       | 1,89      | 1,79          | 2,14      | 1,98          | 2,73      | 2,28          | 4,18      | 2,53          | 2,88      | 2,16          |
| 2,01   | 1,84       | 2,04      | 2,08          | 2,81      | 1,5           | 3,26      | 2,23          | 3,28      | 1,72          | 3,62      | 1,96          |
| 1,85   | 1,4        | 2,3       | 2,13          | 2,13      | 1,85          | 3         | 1,69          | 2,82      | 2,26          | 2,25      | 1,39          |
| 1,5    | 1,26       | 2,64      | 1,9           | 2,69      | 2,09          | 2,77      | 2,04          | 2,7       | 1,81          | 3,7       | 1,91          |
| 1,87   | 1,18       | 2,33      | 1,95          | 2,26      | 2,21          | 3,39      | 1,91          | 3,16      | 1,87          | 2,42      | 2,57          |
| 1,73   | 1,73       | 1,8       | 1,39          | 2,13      | 1,5           | 2,79      | 0,95          | 3,59      | 1,8           | 3,72      | 2,46          |
| 1,66   | 2,6        | 2,37      | 1,67          | 1,41      | 1,51          | 2,68      | 2,7           | 4,17      | 1,88          | 3,93      | 2,2           |
| 1,53   | 1,82       | 2,25      | 1,54          | 1,98      | 1,69          | 2,91      | 1,37          | 3,87      | 2,09          | 3,39      | 1,61          |
| 1,97   | 2,09       | 2,27      | 2,02          | 2,65      | 2,45          | 4,97      | 2,44          | 2,69      | 2,03          | 3,08      | 1,95          |
| 1,98   | 2,15       | 1,97      | 1,91          | 2,38      | 1,28          | 3,62      | 2,12          | 1,22      | 1,63          | 2,33      | 2,53          |
| 1,82   | 1,6        | 2,11      | 1,79          | 2,16      | 1,57          | 2,84      | 2,24          | 4,05      | 1,38          | 4,57      | 1,82          |
| 1,59   | 2,02       | 2,16      | 1,38          | 2,16      | 2,45          | 3,88      | 2,07          | 2,34      | 2,27          | 2,42      | 2,06          |
| 1,49   | 2,27       | 2,13      | 2,1           | 2,08      | 2,16          | 1,75      | 2,18          | 4,84      | 2,83          | 2,48      | 1,9           |
| 1,97   | 1,98       | 2,38      | 2,01          | 2,02      | 1,07          | 2,43      | 1,87          | 5,56      | 2,24          | 5,08      | 2,1           |
| 1,77   | 2,09       | 2,33      | 2,06          | 2,34      | 2,04          | 3,41      | 1,95          | 2,4       | 2,33          | 4,35      | 2,32          |
| 1,84   | 2,1        | 2,04      | 1,83          | 1,89      | 1,92          | 3,65      | 1,87          | 3,19      | 2,26          | 3,07      | 2,42          |
| 1,92   | 3,08       | 1,96      | 2,81          | 1,67      | 2,55          | 1,8       | 1,78          | 5,17      | 1,98          | 4         | 2,24          |
| 2,56   | 1,94       | 2,06      | 2,62          | 1,72      | 1,82          | 2,25      | 1,86          | 3,36      | 2,3           | 1,66      | 2,63          |
| 1,86   | 1,91       | 2,22      | 1,77          | 2         | 1,82          | 2,95      | 1,85          | 2,67      | 1,96          | 2,55      | 2,49          |
| 1,59   | 1,92       | 1,88      | 2,23          | 2,49      | 1,88          | 2,52      | 1,72          | 1,09      | 1,87          | 4,6       | 2,77          |
| 1,63   | 2          | 2,13      | 1,76          | 2,1       | 1,58          | 3,07      |               | 2,85      |               | 3,38      | 1,83          |
| 1,18   | 2,22       |           | 1,98          | 2,01      | 2,61          | 3,27      |               | 4,49      |               | 2,71      | 1,54          |
|        | 2          |           |               | 2,32      | 2,33          |           |               | 5,81      |               | 2,4       | 2,21          |
|        |            |           |               | 2,3       | 1,9           |           |               | 3,84      |               |           | 2,09          |
|        |            |           |               |           | 2,22          |           |               |           |               |           |               |

Figure 5E Dot plot

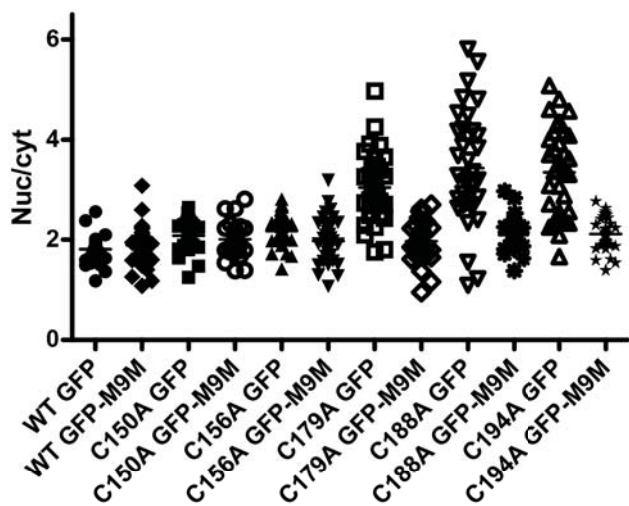

Figure 5E Mean +SD

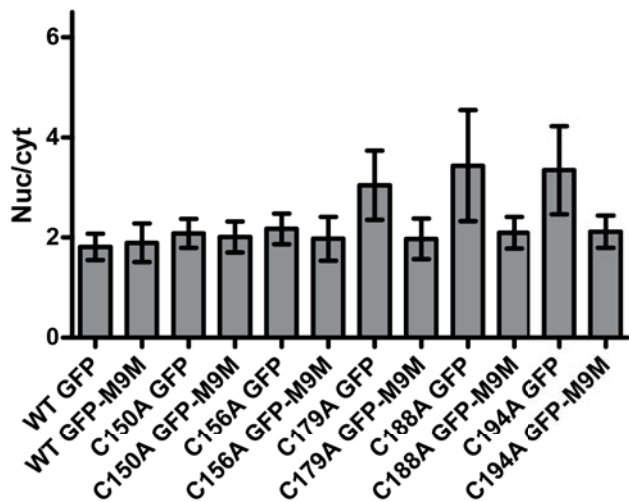

Figure 5E Mean +SEM

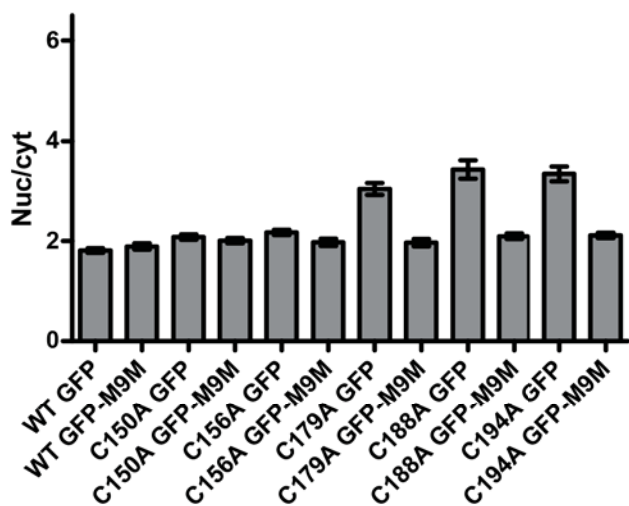

# Figure 5E- Statistical analysis

This file can be opened by [GraphPad Prism](#) (version 5.00 or later).

This file contains 7 data tables and 0 info tables:

- [Col Stats of Fig 5E new](#)
- [WT GFP vs GFP-M9M](#)
- [C150A GFP vs GFP-M9M](#)
- [C156A GFP vs GFP-M9M](#)
- [C179A GFP vs GFP-M9M](#)
- [C188A GFP vs GFP-M9M](#)
- [C194A GFP vs GFP-M9M](#)

## Col Stats of Fig 5E new

|                                     | WT GFP  | WT GFP-M9M | C150A GFP | C150A GFP-M9M | C156A GFP | C156A GFP-M9M | C179A GFP | C179A GFP-M9M | C188A GFP | C188A GFP-M9M | C194A GFP | C194A GFP-M9M |
|-------------------------------------|---------|------------|-----------|---------------|-----------|---------------|-----------|---------------|-----------|---------------|-----------|---------------|
| Number of values                    | 34      | 35         | 33        | 34            | 36        | 37            | 34        | 32            | 36        | 32            | 35        | 36            |
| Minimum                             | 1.180   | 1.080      | 1.250     | 1.380         | 1.410     | 1.070         | 1.750     | 0.9500        | 1.090     | 1.380         | 1.660     | 1.390         |
| 25% Percentile                      | 1.620   | 1.650      | 1.885     | 1.790         | 2.010     | 1.680         | 2.528     | 1.720         | 2.705     | 1.890         | 2.480     | 1.903         |
| Median                              | 1.845   | 1.920      | 2.130     | 2.015         | 2.135     | 1.910         | 2.975     | 1.930         | 3.240     | 2.050         | 3.380     | 2.110         |
| 75% Percentile                      | 1.933   | 2.090      | 2.295     | 2.150         | 2.370     | 2.275         | 3.470     | 2.238         | 4.178     | 2.260         | 4.080     | 2.395         |
| Maximum                             | 2.560   | 3.080      | 2.640     | 2.810         | 2.810     | 3.190         | 4.970     | 2.700         | 5.810     | 2.970         | 5.080     | 2.770         |
| Mean                                | 1.810   | 1.894      | 2.081     | 2.009         | 2.174     | 1.976         | 3.042     | 1.972         | 3.433     | 2.095         | 3.343     | 2.114         |
| Std. Deviation                      | 0.2632  | 0.3848     | 0.2905    | 0.3098        | 0.3051    | 0.4395        | 0.6905    | 0.4054        | 1.109     | 0.3176        | 0.8794    | 0.3257        |
| Std. Error                          | 0.04514 | 0.06504    | 0.05056   | 0.05313       | 0.05085   | 0.07225       | 0.1184    | 0.07167       | 0.1848    | 0.05615       | 0.1486    | 0.05428       |
| Lower 95% CI of mean                | 1.718   | 1.762      | 1.978     | 1.901         | 2.070     | 1.829         | 2.801     | 1.825         | 3.058     | 1.981         | 3.040     | 2.004         |
| Upper 95% CI of mean                | 1.902   | 2.026      | 2.184     | 2.117         | 2.277     | 2.122         | 3.283     | 2.118         | 3.809     | 2.210         | 3.645     | 2.224         |
| KS normality test                   |         |            |           |               |           |               |           |               |           |               |           |               |
| KS distance                         | 0.1412  | 0.1098     | 0.09099   | 0.1199        | 0.1240    | 0.09095       | 0.05610   | 0.09253       | 0.09554   | 0.1050        | 0.1275    | 0.07614       |
| P value                             | 0.0835  | > 0.10     | > 0.10    | > 0.10        | > 0.10    | > 0.10        | > 0.10    | > 0.10        | > 0.10    | > 0.10        | > 0.10    | > 0.10        |
| Passed normality test (alpha=0.05)? | Yes     | Yes        | Yes       | Yes           | Yes       | Yes           | Yes       | Yes           | Yes       | Yes           | Yes       | Yes           |
| P value summary                     | ns      | ns         | ns        | ns            | ns        | ns            | ns        | ns            | ns        | ns            | ns        | ns            |
| Sum                                 | 61.53   | 66.28      | 68.67     | 68.31         | 78.25     | 73.10         | 103.4     | 63.09         | 123.6     | 67.05         | 117.0     | 76.11         |

## WT GFP vs GFP-M9M

|                                         | Data Set-A           |
|-----------------------------------------|----------------------|
| Table Analyzed                          | Fig 5E new           |
| Column A                                | WT GFP               |
| vs                                      | vs                   |
| Column B                                | WT GFP-M9M           |
| Unpaired t test with Welch's correction |                      |
| P value                                 | 0.2929               |
| P value summary                         | ns                   |
| Are means signif. different? (P < 0.05) | No                   |
| One- or two-tailed P value?             | Two-tailed           |
| Welch-corrected t, df                   | t=1.061 df=60        |
| How big is the difference?              |                      |
| Mean ± SEM of column A                  | 1.810 ± 0.04514 N=34 |
| Mean ± SEM of column B                  | 1.894 ± 0.06504 N=35 |
| Difference between means                | -0.08401 ± 0.07917   |
| 95% confidence interval                 | -0.2424 to 0.07433   |
| R squared                               | 0.01842              |
| F test to compare variances             |                      |
| F,DFn, Dfd                              | 2.137, 34, 33        |
| P value                                 | 0.0316               |
| P value summary                         | *                    |
| Are variances significantly different?  | Yes                  |

**C150A GFP vs GFP-M9M**

|                                         | Data Set-A           |
|-----------------------------------------|----------------------|
| Table Analyzed                          | Data 1               |
| Column B                                | C150A GFP            |
| vs                                      | vs                   |
| Column H                                | C150A GFP-M9M        |
| Unpaired t test                         |                      |
| P value                                 | 0.3318               |
| P value summary                         | ns                   |
| Are means signif. different? (P < 0.05) | No                   |
| One- or two-tailed P value?             | Two-tailed           |
| t, df                                   | t=-0.9779 df=65      |
| How big is the difference?              |                      |
| Mean ± SEM of column B                  | 2.081 ± 0.05056 N=33 |
| Mean ± SEM of column H                  | 2.009 ± 0.05313 N=34 |
| Difference between means                | 0.07179 ± 0.07342    |
| 95% confidence interval                 | -0.07492 to 0.2185   |
| R squared                               | 0.01450              |
| F test to compare variances             |                      |
| F,DFn, Dfd                              | 1.138, 33, 32        |
| P value                                 | 0.7167               |
| P value summary                         | ns                   |
| Are variances significantly different?  | No                   |

**C156A GFP vs GFP-M9M**

|                                         | Data Set-A           |
|-----------------------------------------|----------------------|
| Table Analyzed                          | Data 1               |
| Column C                                | C156A GFP            |
| vs                                      | vs                   |
| Column I                                | C156A GFP-M9M        |
| Unpaired t test with Welch's correction |                      |
| P value                                 | 0.0285               |
| P value summary                         | *                    |
| Are means signif. different? (P < 0.05) | Yes                  |
| One- or two-tailed P value?             | Two-tailed           |
| Welch-corrected t, df                   | t=2.240 df=64        |
| How big is the difference?              |                      |
| Mean ± SEM of column C                  | 2.174 ± 0.05085 N=36 |
| Mean ± SEM of column I                  | 1.976 ± 0.07225 N=37 |
| Difference between means                | 0.1979 ± 0.08835     |
| 95% confidence interval                 | 0.02136 to 0.3745    |
| R squared                               | 0.07272              |
| F test to compare variances             |                      |
| F,DFn, Dfd                              | 2.075, 36, 35        |
| P value                                 | 0.0331               |
| P value summary                         | *                    |
| Are variances significantly different?  | Yes                  |

**C179A GFP vs GFP-M9M**

|                                         | Data Set-A    |
|-----------------------------------------|---------------|
| Table Analyzed                          | Data 1        |
| Column G                                | C179A GFP     |
| vs                                      | vs            |
| Column H                                | C179A GFP-M9M |
| Unpaired t test with Welch's correction |               |
| P value                                 | < 0.0001      |
| P value summary                         | ***           |
| Are means signif. different? (P < 0.05) | Yes           |
| One- or two-tailed P value?             | Two-tailed    |
| Welch-corrected t, df                   | t=7.731 df=53 |

|                                        |                      |
|----------------------------------------|----------------------|
| How big is the difference?             |                      |
| Mean ± SEM of column G                 | 3.042 ± 0.1184 N=34  |
| Mean ± SEM of column H                 | 1.972 ± 0.07167 N=32 |
| Difference between means               | 1.070 ± 0.1384       |
| 95% confidence interval                | 0.7923 to 1.348      |
| R squared                              | 0.5300               |
| F test to compare variances            |                      |
| F,DFn, Dfd                             | 2.901, 33, 31        |
| P value                                | 0.0037               |
| P value summary                        | **                   |
| Are variances significantly different? | Yes                  |

#### C188A GFP vs GFP-M9M

|                                         | Data Set-A           |
|-----------------------------------------|----------------------|
| Table Analyzed                          | Data 1               |
| Column E                                | C188A GFP            |
| vs                                      | vs                   |
| Column K                                | C188A GFP-M9M        |
| Unpaired t test with Welch's correction |                      |
| P value                                 | < 0.0001             |
| P value summary                         | ***                  |
| Are means signif. different? (P < 0.05) | Yes                  |
| One- or two-tailed P value?             | Two-tailed           |
| Welch-corrected t, df                   | t=6.927 df=41        |
| How big is the difference?              |                      |
| Mean ± SEM of column E                  | 3.433 ± 0.1848 N=36  |
| Mean ± SEM of column K                  | 2.095 ± 0.05615 N=32 |
| Difference between means                | 1.338 ± 0.1932       |
| 95% confidence interval                 | 0.9478 to 1.728      |
| R squared                               | 0.5392               |
| F test to compare variances             |                      |
| F,DFn, Dfd                              | 12.19, 35, 31        |
| P value                                 | < 0.0001             |
| P value summary                         | ***                  |
| Are variances significantly different?  | Yes                  |

#### C194A GFP vs GFP-M9M

|                                         | Data Set-A           |
|-----------------------------------------|----------------------|
| Table Analyzed                          | Data 1               |
| Column F                                | C194A GFP            |
| vs                                      | vs                   |
| Column L                                | C194A GFP-M9M        |
| Unpaired t test with Welch's correction |                      |
| P value                                 | < 0.0001             |
| P value summary                         | ***                  |
| Are means signif. different? (P < 0.05) | Yes                  |
| One- or two-tailed P value?             | Two-tailed           |
| Welch-corrected t, df                   | t=7.763 df=42        |
| How big is the difference?              |                      |
| Mean ± SEM of column F                  | 3.343 ± 0.1486 N=35  |
| Mean ± SEM of column L                  | 2.114 ± 0.05428 N=36 |
| Difference between means                | 1.228 ± 0.1582       |
| 95% confidence interval                 | 0.9089 to 1.548      |
| R squared                               | 0.5893               |
| F test to compare variances             |                      |
| F,DFn, Dfd                              | 7.292, 34, 35        |
| P value                                 | < 0.0001             |
| P value summary                         | ***                  |
| Are variances significantly different?  | Yes                  |

Figure 6B - Raw data

This file can be opened by [GraphPad Prism](#) (version 5.00 or later).

This file contains 1 data tables and 0 info tables:

- [Fig. 6B](#)

**Fig. 6B**

| C179A | C179A<br>P189A Y190A | C179A<br>P378A Y379A | R135A<br>K137A C179A | R166A<br>R170A K173A<br>K175A C179A | WT   |
|-------|----------------------|----------------------|----------------------|-------------------------------------|------|
| 3,92  | 1,85                 | 4,94                 | 3,84                 | 1,81                                | 2,08 |
| 3,3   | 1,67                 | 4,92                 | 2,95                 | 1,84                                | 1,99 |
| 4,89  | 1,79                 | 2,93                 | 2,8                  | 1,74                                | 1,91 |
| 4,26  | 2,2                  | 2,54                 | 4,1                  | 1,81                                | 2,56 |
| 2,99  | 1,94                 | 2,57                 | 2,95                 | 1,86                                | 1,79 |
| 4,05  | 1,56                 | 4,07                 | 2,54                 | 2,09                                | 1,73 |
| 4,74  | 1,52                 | 2,47                 | 4,2                  | 2,15                                | 1,34 |
| 2,37  | 1,8                  | 3,09                 | 2,75                 | 1,99                                | 1,32 |
| 2,44  | 1,89                 | 5,04                 | 2,53                 | 2,23                                | 1,66 |
| 3,8   | 1,68                 | 3,26                 | 3,49                 | 2,2                                 | 1,45 |
| 3,62  | 1,95                 | 2,79                 | 3,19                 | 2,05                                | 1,75 |
| 3,84  | 2,06                 | 2,85                 | 2,89                 | 1,76                                | 1,76 |
| 3,03  | 1,73                 | 2,9                  | 2,84                 | 1,89                                | 2,34 |
| 2,64  | 1,35                 | 2,12                 | 2,85                 | 1,65                                | 1,77 |
| 2,81  | 1,5                  | 3,51                 | 2,9                  | 1,75                                | 2,74 |
| 3,76  | 2,01                 | 4,9                  | 3,39                 | 1,69                                | 2,32 |
| 3,92  | 1,6                  | 4,41                 | 3,01                 | 1,77                                | 1,47 |
| 2,63  | 1,82                 | 2,81                 | 2,49                 | 1,97                                | 1,78 |
| 3,03  | 1,99                 | 4,09                 | 3,17                 | 1,82                                | 2,18 |
| 3,49  | 1,54                 | 2,71                 | 3,02                 | 2,05                                | 1,95 |
| 3,87  | 1,62                 | 3,44                 | 3,4                  | 2                                   | 1,74 |
| 3,84  | 1,32                 | 3,19                 | 2,92                 | 1,96                                | 1,67 |
| 2,96  | 1,89                 | 3,71                 | 2,42                 | 2,26                                | 2,13 |
| 3,33  | 2,13                 | 4,71                 | 3,56                 | 1,78                                | 1,98 |
| 2,89  | 2,01                 | 4,67                 | 2,55                 | 1,82                                | 1,89 |
| 2,97  | 1,76                 | 2,48                 | 3,07                 | 1,89                                | 1,66 |
| 3,63  | 1,87                 | 2,23                 | 3,32                 | 2,05                                | 1,63 |
| 3,54  | 1,82                 | 4,11                 | 3,97                 | 1,75                                | 1,78 |
| 3,79  | 1,58                 | 4,66                 | 3,41                 | 1,69                                | 2,02 |
| 4,69  | 1,65                 | 4,39                 | 2,96                 | 1,6                                 | 2,28 |
| 4,24  | 1,6                  | 4,06                 | 2,83                 | 2,31                                | 1,64 |
| 3,41  | 1,68                 | 2,89                 | 3,96                 | 2,18                                | 1,71 |
| 4,08  | 1,32                 | 3,97                 | 2,99                 | 1,75                                | 1,72 |
| 4,34  | 1,62                 | 3,27                 | 4,26                 | 2,31                                | 1,45 |
| 2,41  | 1,88                 | 2,22                 | 3,62                 | 1,89                                | 1,72 |
| 2,61  | 2                    | 3,34                 | 3,08                 | 2,12                                | 1,59 |
| 3,87  | 1,73                 | 2,64                 | 2,65                 | 1,98                                |      |
| 3,34  | 1,82                 | 2,96                 | 2,67                 | 2,05                                |      |

|  |  |      |     |             |  |
|--|--|------|-----|-------------|--|
|  |  | 2,75 | 2,4 | 1,65<br>1,9 |  |
|--|--|------|-----|-------------|--|

---

Fig.6B Dot plot

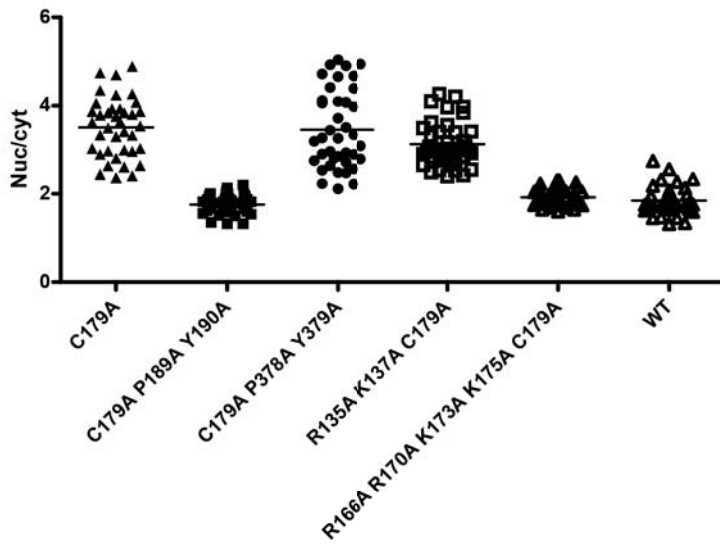

Fig. 6B Mean with SD

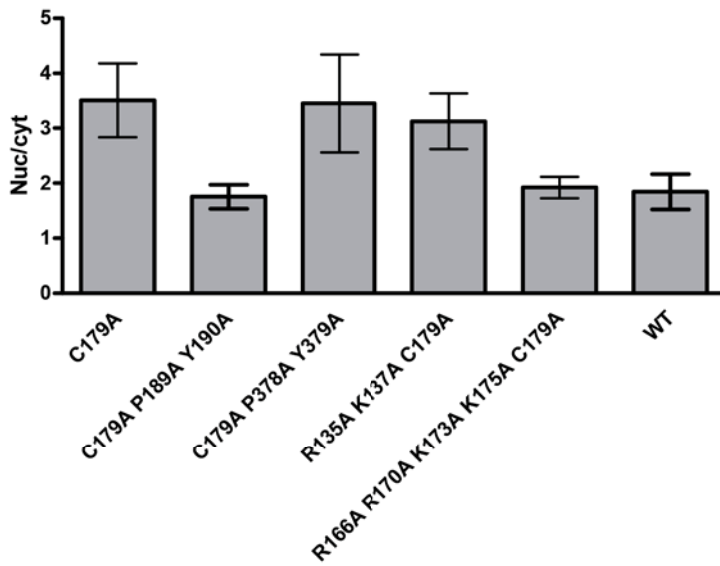

Fig. 6B Mean with SEM

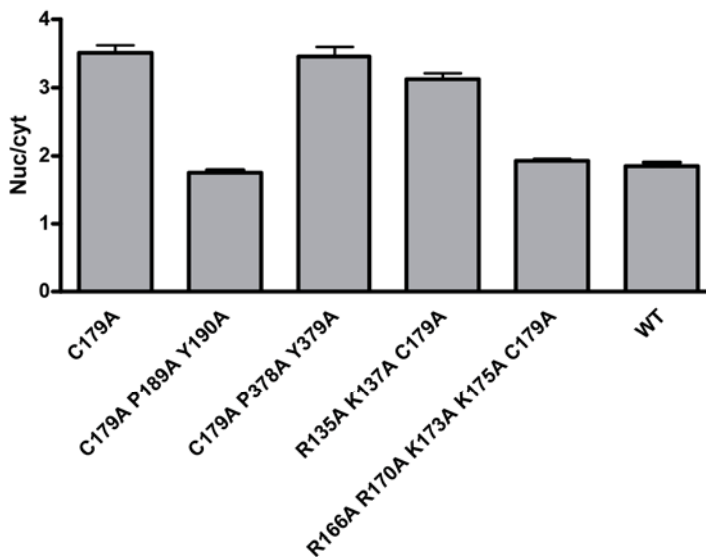



## Figure 6B - Statistical analysis

This file can be opened by [GraphPad Prism](#) (version 5.00 or later).

This file contains 6 data tables and 0 info tables:

- [Col Stats of Fig. 6B](#)
- [C179A vs C179A P189A Y190A](#)
- [C179A vs C179A P378A Y379A](#)
- [C179A vs R135A K137A C179A](#)
- [C179A vs R166A R170A K173A K175A C179A](#)
- [WT vs R166A R170A K173A K175A C179A](#)

### Col Stats of Fig. 6B

|                                     | C179A  | C179A<br>P189A<br>Y190A | C179A<br>P378A<br>Y379A | R135A<br>K137A<br>C179A | R166A<br>R170A<br>K173A<br>K175A<br>C179A | WT      |
|-------------------------------------|--------|-------------------------|-------------------------|-------------------------|-------------------------------------------|---------|
| Number of values                    | 38     | 38                      | 39                      | 39                      | 40                                        | 36      |
| Minimum                             | 2.370  | 1.320                   | 2.120                   | 2.400                   | 1.600                                     | 1.320   |
| 25% Percentile                      | 2.968  | 1.600                   | 2.750                   | 2.800                   | 1.763                                     | 1.660   |
| Median                              | 3.580  | 1.775                   | 3.260                   | 2.990                   | 1.890                                     | 1.765   |
| 75% Percentile                      | 3.920  | 1.903                   | 4.110                   | 3.410                   | 2.050                                     | 2.013   |
| Maximum                             | 4.890  | 2.200                   | 5.040                   | 4.260                   | 2.310                                     | 2.740   |
| Mean                                | 3.509  | 1.757                   | 3.452                   | 3.127                   | 1.927                                     | 1.847   |
| Std. Deviation                      | 0.6696 | 0.2164                  | 0.8867                  | 0.5082                  | 0.1939                                    | 0.3230  |
| Std. Error                          | 0.1086 | 0.03510                 | 0.1420                  | 0.08138                 | 0.03066                                   | 0.05383 |
| Lower 95% CI of mean                | 3.289  | 1.685                   | 3.164                   | 2.962                   | 1.864                                     | 1.738   |
| Upper 95% CI of mean                | 3.729  | 1.828                   | 3.739                   | 3.291                   | 1.989                                     | 1.956   |
| KS normality test                   |        |                         |                         |                         |                                           |         |
| KS distance                         | 0.1049 | 0.06264                 | 0.1462                  | 0.1520                  | 0.1085                                    | 0.1814  |
| P value                             | > 0.10 | > 0.10                  | 0.0349                  | 0.0236                  | > 0.10                                    | 0.0042  |
| Passed normality test (alpha=0.05)? | Yes    | Yes                     | No                      | No                      | Yes                                       | No      |
| P value summary                     | ns     | ns                      | *                       | *                       | ns                                        | **      |
| Sum                                 | 133.3  | 66.75                   | 134.6                   | 121.9                   | 77.06                                     | 66.50   |

### C179A vs C179A P189A Y190A

|                | Data Set-A        |
|----------------|-------------------|
| Table Analyzed | Fig. 6B           |
| Column A       | C179A             |
| vs             | vs                |
| Column B       | C179A P189A Y190A |

|                                           |                        |
|-------------------------------------------|------------------------|
| Mann Whitney test                         |                        |
| P value                                   | < 0.0001               |
| Exact or approximate P value?             | Gaussian Approximation |
| P value summary                           | ***                    |
| Are medians signif. different? (P < 0.05) | Yes                    |
| One- or two-tailed P value?               | Two-tailed             |
| Sum of ranks in column A,B                | 2185 , 741             |
| Mann-Whitney U                            | 0.0000                 |

---

**C179A vs C179A P378A Y379A**

|                                           | Data Set-A             |
|-------------------------------------------|------------------------|
| Table Analyzed                            | Fig. 6B                |
| Column A                                  | C179A                  |
| vs                                        | vs                     |
| Column C                                  | C179A P378A Y379A      |
| Mann Whitney test                         |                        |
| P value                                   | 0.5962                 |
| Exact or approximate P value?             | Gaussian Approximation |
| P value summary                           | ns                     |
| Are medians signif. different? (P < 0.05) | No                     |
| One- or two-tailed P value?               | Two-tailed             |
| Sum of ranks in column A,C                | 1535 , 1469            |
| Mann-Whitney U                            | 688.5                  |

---

**C179A vs R135A K137A C179A**

|                                           | Data Set-A             |
|-------------------------------------------|------------------------|
| Table Analyzed                            | Fig. 6B                |
| Column A                                  | C179A                  |
| vs                                        | vs                     |
| Column D                                  | R135A K137A C179A      |
| Mann Whitney test                         |                        |
| P value                                   | 0.0118                 |
| Exact or approximate P value?             | Gaussian Approximation |
| P value summary                           | *                      |
| Are medians signif. different? (P < 0.05) | Yes                    |
| One- or two-tailed P value?               | Two-tailed             |
| Sum of ranks in column A,D                | 1730 , 1274            |
| Mann-Whitney U                            | 493.5                  |

---

**C179A vs R166A R170A K173A K175A C179A**

|  | Data Set-A |
|--|------------|
|  |            |

|                                           |                               |
|-------------------------------------------|-------------------------------|
| Table Analyzed                            | Fig. 6B                       |
| Column A                                  | C179A                         |
| vs                                        | vs                            |
| Column E                                  | R166A R170A K173A K175A C179A |
| Mann Whitney test                         |                               |
| P value                                   | < 0.0001                      |
| Exact or approximate P value?             | Gaussian Approximation        |
| P value summary                           | ***                           |
| Are medians signif. different? (P < 0.05) | Yes                           |
| One- or two-tailed P value?               | Two-tailed                    |
| Sum of ranks in column A,E                | 2261 , 820                    |
| Mann-Whitney U                            | 0.0000                        |

---

**WT vs R166A R170A K173A K175A C179A**

|                                           | Data Set-A                    |
|-------------------------------------------|-------------------------------|
| Table Analyzed                            | Data 1                        |
| Column E                                  | R166A R170A K173A K175A C179A |
| vs                                        | vs                            |
| Column F                                  | WT                            |
| Mann Whitney test                         |                               |
| P value                                   | 0.0562                        |
| Exact or approximate P value?             | Gaussian Approximation        |
| P value summary                           | ns                            |
| Are medians signif. different? (P < 0.05) | No                            |
| One- or two-tailed P value?               | Two-tailed                    |
| Sum of ranks in column E,F                | 1724 , 1202                   |
| Mann-Whitney U                            | 536.0                         |

---

## Figure 7B - Raw data

This file can be opened by [GraphPad Prism](#) (version 5.00 or later).

This file contains 1 data tables and 0 info tables:

- [Fig 7B](#)

**Fig 7B**

| Cherry | Cherry+LMB | Cherry-TTP<br>WT | Cherry-TTP<br>WT+LMB | C139A | C139A+LMB | C139A<br>P149A<br>Y150A | C139A<br>P149A<br>Y150A+LMB | R126A<br>R130A<br>C139A<br>P149A<br>Y150A | R126A<br>R130A<br>C139A<br>P149A<br>Y150A+ |
|--------|------------|------------------|----------------------|-------|-----------|-------------------------|-----------------------------|-------------------------------------------|--------------------------------------------|
| 2,26   | 2,01       | 0,71             | 3,13                 | 1,28  | 16,18     | 0,76                    | 6,43                        | 1,06                                      | 2,22                                       |
| 2,73   | 2,8        | 0,74             | 4,08                 | 0,86  | 7,65      | 1,44                    | 2,91                        | 0,95                                      | 2,31                                       |
| 2,81   | 2,44       | 1                | 6,05                 | 0,79  | 8,72      | 1,11                    | 2,61                        | 0,99                                      | 2,72                                       |
| 2,2    | 3,4        | 1,12             | 5,02                 | 0,96  | 4,28      | 1,04                    | 3,5                         | 1,15                                      | 1,52                                       |
| 2,11   | 2,5        | 1,04             | 6,53                 | 1,09  | 6,45      | 1,19                    | 2,66                        | 0,96                                      | 2,01                                       |
| 2,31   | 2,13       | 1,09             | 5,92                 | 1,18  | 3,42      | 0,92                    | 4,47                        | 0,84                                      | 2,01                                       |
| 2,5    | 2,38       | 1,16             | 7,71                 | 0,98  | 11,49     | 0,9                     | 3,49                        | 0,77                                      | 1,64                                       |
| 2,66   | 2,59       | 0,93             | 5,58                 | 0,82  | 10,54     | 1,3                     | 2,93                        | 1,09                                      | 2,08                                       |
| 2,14   | 2,48       | 1,43             | 6,13                 | 1,1   | 6,02      | 1                       | 3,01                        | 1,01                                      | 2,37                                       |
| 1,77   | 2,61       | 1,49             | 2,38                 | 1,09  | 7,74      | 0,96                    | 4,17                        | 0,92                                      | 2,04                                       |
| 1,45   | 2,41       | 1,17             | 5,54                 | 1,28  | 7,26      | 0,94                    | 3,41                        | 0,96                                      | 3,06                                       |
| 1,97   | 2,75       | 0,83             | 7,28                 | 1,03  | 8,06      | 1,02                    | 2,81                        | 0,9                                       | 2,49                                       |
| 2,07   | 1,66       | 0,9              | 3,65                 | 1,07  | 14,53     | 1,3                     | 3,78                        | 0,87                                      | 2,57                                       |
| 3,08   | 2,39       | 0,95             | 6,02                 | 0,77  | 8,05      | 1,3                     | 2,23                        | 0,89                                      | 1,63                                       |
| 1,9    | 2,08       | 1,22             | 5,92                 | 1,11  | 10,46     | 1,08                    | 2,98                        | 0,84                                      | 2,64                                       |
| 2,06   | 2,78       | 1,31             | 7,95                 | 0,73  | 4,52      | 1,13                    | 2,45                        | 0,76                                      | 2,25                                       |
| 2,2    | 2,73       | 1,07             | 9,53                 | 1,06  | 4,19      | 0,9                     | 3,94                        | 1,15                                      | 2,07                                       |
| 2,12   | 2,38       | 1,26             | 5,46                 | 1,44  | 4,66      | 1,03                    | 3,49                        | 0,91                                      | 1,97                                       |
| 2,05   | 3,05       | 0,7              | 4,92                 | 1,32  | 4,98      | 1,39                    | 2,57                        | 1,18                                      | 2,73                                       |
| 2,41   | 2,13       | 0,59             | 5,79                 | 1,15  | 5,82      | 1,2                     | 2,73                        | 1,04                                      | 2,19                                       |
| 2,12   | 2,24       | 1,01             | 6,17                 | 0,9   | 4,21      | 0,83                    | 4,03                        | 1,29                                      | 2,09                                       |
| 2,29   | 2,07       | 1,17             | 6,15                 | 0,87  | 4,21      | 1,28                    | 2,9                         | 0,75                                      | 2,92                                       |
| 3,11   | 2,68       | 1,08             | 3,06                 | 1,38  | 13,39     | 1,11                    | 3,45                        | 0,85                                      | 1,76                                       |
| 2,38   | 2,42       | 0,95             | 4,37                 | 0,99  | 8,95      | 1                       | 4,27                        | 0,83                                      | 1,64                                       |
| 2,62   | 1,96       | 1,41             | 2,03                 | 0,75  | 8,04      | 1,52                    | 3,59                        | 0,78                                      | 1,82                                       |
| 2,14   | 2          | 1,03             | 6,57                 | 0,77  | 5,17      | 0,97                    | 4,73                        | 0,96                                      | 1,96                                       |
| 2,55   | 2,76       | 1,17             | 3,07                 | 1,07  | 8,5       | 1,19                    | 3,25                        | 1,09                                      | 1,9                                        |
| 2,62   | 2,57       | 1,2              | 2,75                 | 1,24  | 7,15      | 0,69                    | 3,28                        | 1,14                                      | 1,9                                        |
| 2,16   | 2,49       | 1,12             | 2                    | 0,85  | 5,88      | 1,15                    | 3,04                        | 0,85                                      | 2,06                                       |
| 1,87   | 2,03       | 1,32             | 2,61                 | 1,16  | 5,02      | 1,4                     | 3,14                        | 0,68                                      | 1,87                                       |
|        | 1,93       | 1,02             | 5,52                 |       | 6,01      |                         |                             |                                           |                                            |
|        |            | 1,02             | 4,88                 |       | 4         |                         |                             |                                           |                                            |
|        |            | 1,01             | 3,16                 |       |           |                         |                             |                                           |                                            |
|        |            | 0,99             |                      |       |           |                         |                             |                                           |                                            |

Fig 7B Mean +SEM

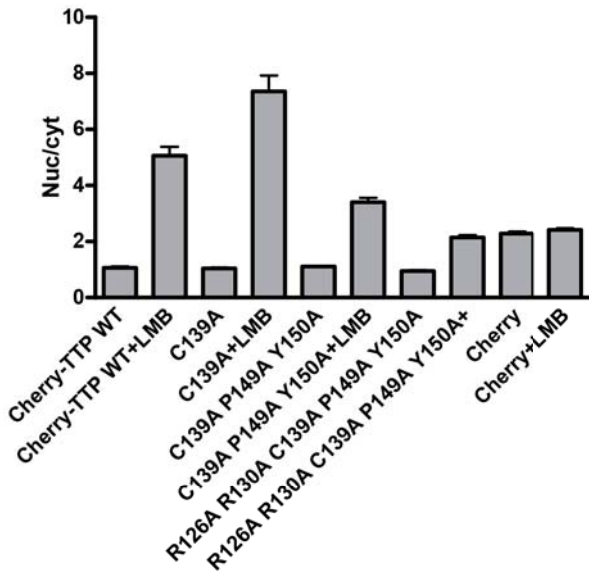

Fig 7B Mean+SD

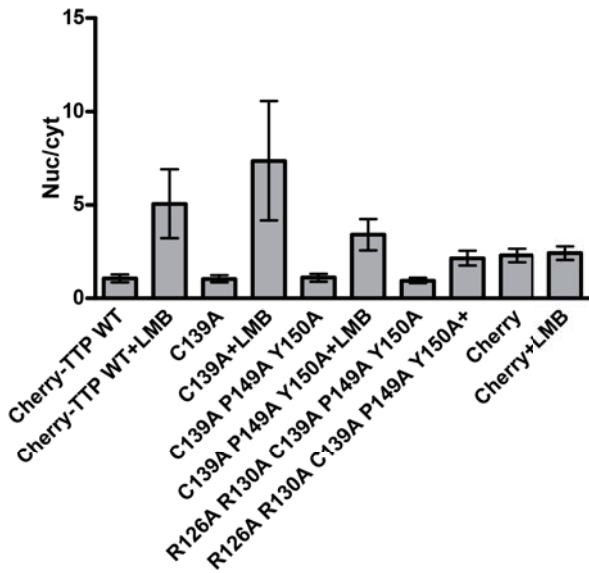

Fig 7B Dot plot

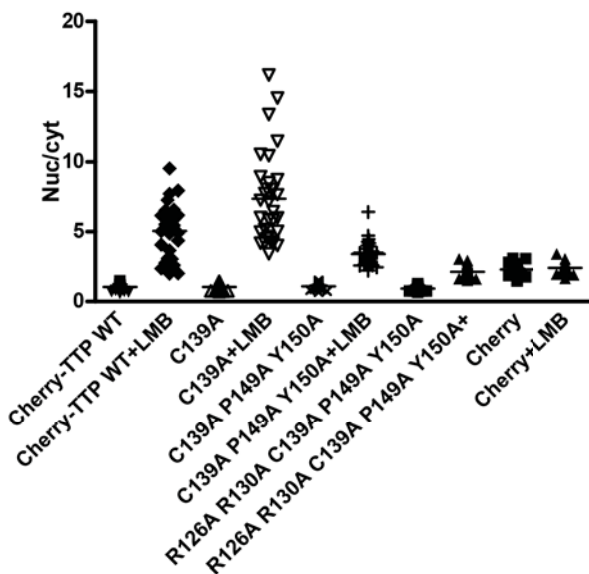

# Figure 7B - Statistical analysis

This file can be opened by [GraphPad Prism](#) (version 5.00 or later).

This file contains 5 data tables and 0 info tables:

- [Col Stats of Fig 7B](#)
- [WT+L vs C139A +L](#)
- [C139A+L vs C139A P149A Y150A +L](#)
- [C139A+L vs R126A R130A C139A P149A Y150A+L](#)
- [Cherry vs Cherry+L](#)

## Col Stats of Fig 7B

|                                     | Cherry  | Cherry+LMB | Cherry-TTP WT | Cherry-TTP WT+LMB | C139A   | C139A+LMB | C139A P149A Y150A | C139A P149A Y150A+LMB | R126A R130A C139A P149A Y150A | R126A R130A C139A P149A Y150A+ |
|-------------------------------------|---------|------------|---------------|-------------------|---------|-----------|-------------------|-----------------------|-------------------------------|--------------------------------|
| Number of values                    | 30      | 31         | 34            | 33                | 30      | 32        | 30                | 30                    | 30                            | 30                             |
| Minimum                             | 1.450   | 1.660      | 0.5900        | 2.000             | 0.7300  | 3.420     | 0.6900            | 2.230                 | 0.6800                        | 1.520                          |
| 25% Percentile                      | 2.068   | 2.080      | 0.9500        | 3.145             | 0.8575  | 4.740     | 0.9550            | 2.878                 | 0.8400                        | 1.893                          |
| Median                              | 2.200   | 2.420      | 1.055         | 5.520             | 1.065   | 6.800     | 1.095             | 3.265                 | 0.9350                        | 2.065                          |
| 75% Percentile                      | 2.568   | 2.680      | 1.178         | 6.140             | 1.165   | 8.665     | 1.285             | 3.820                 | 1.068                         | 2.400                          |
| Maximum                             | 3.110   | 3.400      | 1.490         | 9.530             | 1.440   | 16.18     | 1.520             | 6.430                 | 1.290                         | 3.060                          |
| Mean                                | 2.289   | 2.415      | 1.065         | 5.058             | 1.036   | 7.361     | 1.102             | 3.408                 | 0.9487                        | 2.148                          |
| Std. Deviation                      | 0.3707  | 0.3692     | 0.2079        | 1.845             | 0.1980  | 3.194     | 0.2047            | 0.8416                | 0.1478                        | 0.3939                         |
| Std. Error                          | 0.06768 | 0.06632    | 0.03566       | 0.3212            | 0.03615 | 0.5646    | 0.03736           | 0.1537                | 0.02698                       | 0.07192                        |
| Lower 95% CI of mean                | 2.150   | 2.279      | 0.9925        | 4.404             | 0.9624  | 6.209     | 1.025             | 3.094                 | 0.8935                        | 2.001                          |
| Upper 95% CI of mean                | 2.427   | 2.550      | 1.138         | 5.713             | 1.110   | 8.512     | 1.178             | 3.723                 | 1.004                         | 2.295                          |
| KS normality test                   |         |            |               |                   |         |           |                   |                       |                               |                                |
| KS distance                         | 0.1279  | 0.1079     | 0.09446       | 0.1316            | 0.09953 | 0.1321    | 0.08508           | 0.1566                | 0.1028                        | 0.1585                         |
| P value                             | > 0.10  | > 0.10     | > 0.10        | > 0.10            | > 0.10  | > 0.10    | > 0.10            | 0.0583                | > 0.10                        | 0.0525                         |
| Passed normality test (alpha=0.05)? | Yes     | Yes        | Yes           | Yes               | Yes     | Yes       | Yes               | Yes                   | Yes                           | Yes                            |
| P value summary                     | ns      | ns         | ns            | ns                | ns      | ns        | ns                | ns                    | ns                            | ns                             |
| Sum                                 | 68.66   | 74.85      | 36.21         | 166.9             | 31.09   | 235.6     | 33.05             | 102.3                 | 28.46                         | 64.44                          |

## WT+L vs C139A +L

|                                         | Data Set-A          |
|-----------------------------------------|---------------------|
| Table Analyzed                          | Fig 7B              |
| Column D                                | Cherry-TTP WT+LMB   |
| vs                                      | vs                  |
| Column F                                | C139A+LMB           |
| Unpaired t test with Welch's correction |                     |
| P value                                 | 0.0009              |
| P value summary                         | ***                 |
| Are means signif. different? (P < 0.05) | Yes                 |
| One- or two-tailed P value?             | Two-tailed          |
| Welch-corrected t, df                   | t=3.545 df=49       |
| How big is the difference?              |                     |
| Mean ± SEM of column D                  | 5.058 ± 0.3212 N=33 |
| Mean ± SEM of column F                  | 7.361 ± 0.5646 N=32 |
| Difference between means                | -2.302 ± 0.6495     |
| 95% confidence interval                 | -3.609 to -0.9959   |
| R squared                               | 0.2041              |
| F test to compare variances             |                     |
| F,DFn, Dfd                              | 2.997, 31, 32       |
| P value                                 | 0.0028              |
| P value summary                         | **                  |
| Are variances significantly different?  | Yes                 |

## C139A+L vs C139A P149A Y150A +L

|                                         | Data Set-A            |
|-----------------------------------------|-----------------------|
| Table Analyzed                          | Fig 7B                |
| Column F                                | C139A+LMB             |
| vs                                      | vs                    |
| Column H                                | C139A P149A Y150A+LMB |
| Unpaired t test with Welch's correction |                       |
| P value                                 | < 0.0001              |
| P value summary                         | ***                   |
| Are means signif. different? (P < 0.05) | Yes                   |
| One- or two-tailed P value?             | Two-tailed            |
| Welch-corrected t, df                   | t=6.755 df=35         |
| How big is the difference?              |                       |
| Mean ± SEM of column F                  | 7.361 ± 0.5646 N=32   |
| Mean ± SEM of column H                  | 3.408 ± 0.1537 N=30   |
| Difference between means                | 3.953 ± 0.5851        |
| 95% confidence interval                 | 2.764 to 5.141        |
| R squared                               | 0.5659                |
| F test to compare variances             |                       |
| F,DFn, Dfd                              | 14.40, 31, 29         |
| P value                                 | < 0.0001              |
| P value summary                         | ***                   |
| Are variances significantly different?  | Yes                   |

#### C139A+L vs R126A R130A C139A P149A Y150A+L

|                                         | Data Set-A                     |
|-----------------------------------------|--------------------------------|
| Table Analyzed                          | Fig 7B                         |
| Column F                                | C139A+LMB                      |
| vs                                      | vs                             |
| Column J                                | R126A R130A C139A P149A Y150A+ |
| Unpaired t test with Welch's correction |                                |
| P value                                 | < 0.0001                       |
| P value summary                         | ***                            |
| Are means signif. different? (P < 0.05) | Yes                            |
| One- or two-tailed P value?             | Two-tailed                     |
| Welch-corrected t, df                   | t=9.159 df=32                  |
| How big is the difference?              |                                |
| Mean ± SEM of column F                  | 7.361 ± 0.5646 N=32            |
| Mean ± SEM of column J                  | 2.148 ± 0.07192 N=30           |
| Difference between means                | 5.213 ± 0.5692                 |
| 95% confidence interval                 | 4.053 to 6.373                 |
| R squared                               | 0.7239                         |
| F test to compare variances             |                                |
| F,DFn, Dfd                              | 65.75, 31, 29                  |
| P value                                 | < 0.0001                       |
| P value summary                         | ***                            |
| Are variances significantly different?  | Yes                            |

#### Cherry vs Cherry+L

|                                         | Data Set-A           |
|-----------------------------------------|----------------------|
| Table Analyzed                          | Fig 7B               |
| Column A                                | Cherry               |
| vs                                      | vs                   |
| Column B                                | Cherry+LMB           |
| Unpaired t test                         |                      |
| P value                                 | 0.1892               |
| P value summary                         | ns                   |
| Are means signif. different? (P < 0.05) | No                   |
| One- or two-tailed P value?             | Two-tailed           |
| t, df                                   | t=1.328 df=59        |
| How big is the difference?              |                      |
| Mean ± SEM of column A                  | 2.289 ± 0.06768 N=30 |
| Mean ± SEM of column B                  | 2.415 ± 0.06632 N=31 |
| Difference between means                | -0.1258 ± 0.09475    |
| 95% confidence interval                 | -0.3154 to 0.06374   |
| R squared                               | 0.02903              |

|                                        |               |
|----------------------------------------|---------------|
| F test to compare variances            |               |
| F,DFn, Dfd                             | 1.008, 29, 30 |
| P value                                | 0.9816        |
| P value summary                        | ns            |
| Are variances significantly different? | No            |

---



## Figure S2B - Raw data

This file can be opened by [GraphPad Prism](#) (version 5.00 or later).

This file contains 1 data tables and 0 info tables:

- [Fig S2B](#)

**Fig S2B**

| dTIS11-V5 NT | dTIS11-V5 LMB | dTIS11 Δ 414-436-V5 NT | dTIS11 Δ 414-436-V5 LMB | dTIS11 Δ 254-436-V5 NT | dTIS11 Δ 254-436-V5 LMB | dTIS11 Δ 1-110-V5 NT | dTIS11 Δ 1-110-V5 LMB |
|--------------|---------------|------------------------|-------------------------|------------------------|-------------------------|----------------------|-----------------------|
| 0,86         | 2,38          | 0,68                   | 2,61                    | 1,02                   | 1,95                    | 2,01                 | 1,35                  |
| 0,79         | 1,27          | 0,55                   | 2,23                    | 1,18                   | 2,51                    | 1,38                 | 2,42                  |
| 0,86         | 2,38          | 0,77                   | 1,81                    | 1,01                   | 1,98                    | 2,26                 | 1,33                  |
| 0,59         | 1,35          | 0,76                   | 4,91                    | 0,98                   | 4,75                    | 1,22                 | 2,05                  |
| 0,7          | 2,1           | 0,59                   | 2,15                    | 0,73                   | 2,54                    | 1,94                 | 1,81                  |
| 0,87         | 1,28          | 0,78                   | 1,63                    | 0,8                    | 2,73                    | 2,04                 | 2,02                  |
| 0,9          | 1,66          | 0,67                   | 1,87                    | 0,71                   | 1,7                     | 1,3                  | 1,69                  |
| 0,93         | 1,79          | 0,61                   | 2,8                     | 0,65                   | 3,38                    | 1,56                 | 2,93                  |
| 0,73         | 2,51          | 0,63                   | 1,23                    | 0,78                   | 1,38                    | 1,53                 | 1,84                  |
| 0,76         | 1,64          | 0,67                   | 1,29                    | 0,82                   | 1,7                     | 1,55                 | 2,83                  |
| 0,6          | 3,95          | 0,77                   | 1,2                     | 0,69                   | 2,23                    | 1,1                  | 1,92                  |
| 0,72         | 3,62          | 0,97                   | 2,29                    | 0,92                   | 1,84                    | 1,22                 | 1,28                  |
| 0,75         | 2,06          | 0,94                   | 1,62                    | 0,87                   | 1,51                    | 1,48                 | 1,43                  |
| 0,71         | 2,79          | 0,89                   | 2,57                    | 0,95                   | 2                       | 1,73                 | 2,62                  |
| 0,75         | 1,63          | 0,68                   | 1,35                    | 0,85                   | 2,22                    | 1,77                 | 1,91                  |
| 0,81         | 2,03          | 0,95                   | 2,31                    | 1,07                   | 2,01                    | 1,34                 | 1,85                  |
| 0,67         | 3,43          | 0,76                   | 1,79                    | 0,91                   | 2,08                    | 1,03                 | 0,87                  |
| 0,99         | 1,3           | 0,82                   | 1,46                    | 1,1                    | 2,45                    | 1,41                 | 1,89                  |
| 0,91         | 1,19          | 0,66                   | 3,32                    | 1,37                   | 2,09                    | 1,1                  | 1,43                  |
| 0,64         | 2,12          | 0,75                   | 1,6                     | 0,98                   | 2,15                    | 1,07                 | 2,73                  |
| 0,77         | 2,33          | 0,56                   | 1,89                    | 1,04                   | 1,71                    | 1,54                 | 2,24                  |
| 0,82         | 1,41          | 0,93                   | 1,59                    | 0,87                   | 2,57                    | 1,14                 | 2,9                   |
| 0,9          | 2,24          | 0,73                   | 2,43                    | 0,86                   | 2,53                    | 1,59                 | 3,03                  |
| 0,78         | 1,41          | 0,74                   | 1,7                     | 0,76                   | 2,3                     | 1,34                 | 2,59                  |
| 0,69         | 1,11          | 0,74                   | 1,86                    | 0,82                   | 1,96                    | 1,2                  | 1,34                  |
| 0,69         | 2,07          | 0,69                   | 1,82                    | 0,89                   | 2,2                     | 1,62                 | 1,35                  |
| 0,85         | 3,34          | 0,71                   | 1,41                    | 0,8                    | 2,57                    | 1,23                 | 1,74                  |
| 0,75         | 2,06          | 0,7                    | 1,62                    | 1,41                   | 1,61                    | 1,48                 | 2,53                  |
| 1            | 1,28          | 0,76                   | 3,04                    | 0,87                   | 1,93                    | 1,51                 | 1,48                  |
| 0,7          | 1,54          | 0,83                   | 3,21                    | 0,76                   | 2,64                    | 1,85                 | 2,53                  |
| 0,9          | 1,8           | 0,87                   | 1,56                    | 0,73                   | 1,71                    | 1,92                 | 3,46                  |
| 0,88         | 1,68          | 0,72                   | 1,51                    | 0,72                   | 2,99                    | 0,9                  | 1,62                  |
| 0,72         | 1,76          | 0,76                   |                         | 0,72                   | 1,86                    | 1,32                 |                       |
| 0,97         | 1,55          | 0,81                   |                         | 0,76                   | 2,96                    | 1,17                 |                       |
|              | 2,18          | 0,79                   |                         | 0,88                   | 2,31                    | 1,72                 |                       |
|              | 2,19          |                        |                         |                        | 2,81                    | 1,41                 |                       |
|              | 2,99          |                        |                         |                        |                         |                      |                       |
|              | 1,46          |                        |                         |                        |                         |                      |                       |
|              | 1,34          |                        |                         |                        |                         |                      |                       |

|      |  |  |  |  |  |  |
|------|--|--|--|--|--|--|
| 1,07 |  |  |  |  |  |  |
| 1,71 |  |  |  |  |  |  |
| 1,9  |  |  |  |  |  |  |

---

Fig. S2B Dot plot

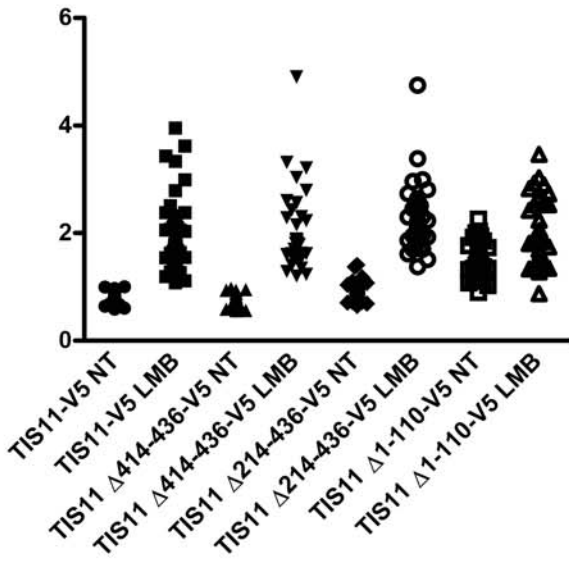

Fig. S2B Mean with SD

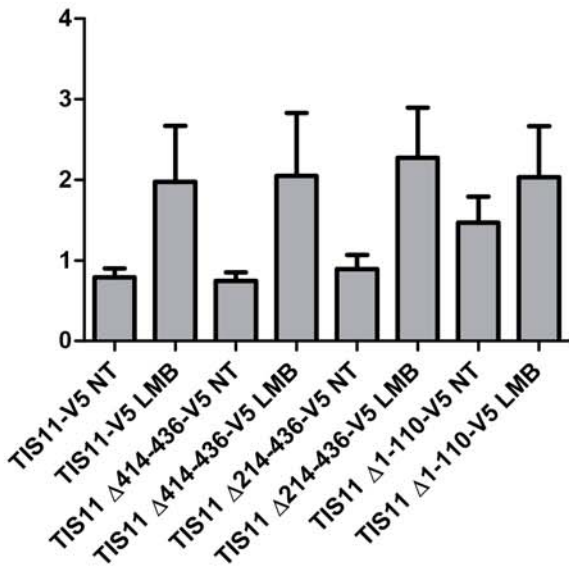

Fig. S2B Mean with SEM

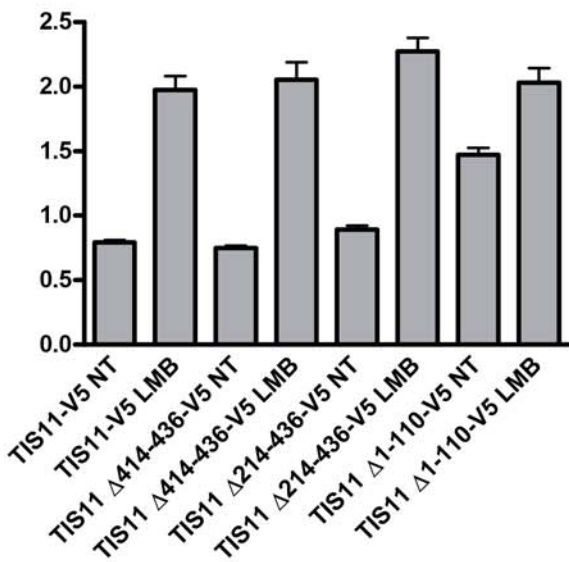

## Figure S2B - Statistical analysis

This file can be opened by [GraphPad Prism](#) (version 5.00 or later).

This file contains 4 data tables and 0 info tables:

- [Col. stats of Fig S2B](#)
- [WT vs delta414-436](#)
- [WT vs delta214-436](#)
- [WT vs delta1-110](#)

### Col. stats of Fig S2B

|                                     | dTIS11-V5 NT | dTIS11-V5 LMB | dTIS11 Δ 414-436-V5 NT | dTIS11 Δ 414-436-V5 LMB | dTIS11 Δ 254-436-V5 NT | dTIS11 Δ 254-436-V5 LMB | dTIS11 Δ 1-110-V5 NT | dTIS11 Δ 1-110-V5 LMB |
|-------------------------------------|--------------|---------------|------------------------|-------------------------|------------------------|-------------------------|----------------------|-----------------------|
| Number of values                    | 34           | 42            | 35                     | 32                      | 35                     | 36                      | 36                   | 32                    |
| Minimum                             | 0.5900       | 1.070         | 0.5500                 | 1.200                   | 0.6500                 | 1.380                   | 0.9000               | 0.8700                |
| 25% Percentile                      | 0.7075       | 1.410         | 0.6800                 | 1.568                   | 0.7600                 | 1.878                   | 1.220                | 1.443                 |
| Median                              | 0.7750       | 1.795         | 0.7500                 | 1.815                   | 0.8700                 | 2.175                   | 1.445                | 1.900                 |
| 75% Percentile                      | 0.8850       | 2.263         | 0.8100                 | 2.400                   | 0.9800                 | 2.563                   | 1.695                | 2.575                 |
| Maximum                             | 1.000        | 3.950         | 0.9700                 | 4.910                   | 1.410                  | 4.750                   | 2.260                | 3.460                 |
| Mean                                | 0.7929       | 1.974         | 0.7497                 | 2.053                   | 0.8937                 | 2.274                   | 1.472                | 2.032                 |
| Std. Deviation                      | 0.1088       | 0.6987        | 0.1064                 | 0.7763                  | 0.1772                 | 0.6210                  | 0.3206               | 0.6338                |
| Std. Error                          | 0.01867      | 0.1078        | 0.01799                | 0.1372                  | 0.02995                | 0.1035                  | 0.05343              | 0.1120                |
| Lower 95% CI of mean                | 0.7550       | 1.756         | 0.7132                 | 1.773                   | 0.8328                 | 2.064                   | 1.363                | 1.803                 |
| Upper 95% CI of mean                | 0.8309       | 2.192         | 0.7863                 | 2.332                   | 0.9546                 | 2.484                   | 1.580                | 2.260                 |
| KS normality test                   |              |               |                        |                         |                        |                         |                      |                       |
| KS distance                         | 0.09458      | 0.1220        | 0.1101                 | 0.2079                  | 0.1369                 | 0.1223                  | 0.08590              | 0.1324                |
| P value                             | > 0.10       | > 0.10        | > 0.10                 | 0.0012                  | 0.0948                 | > 0.10                  | > 0.10               | > 0.10                |
| Passed normality test (alpha=0.05)? | Yes          | Yes           | Yes                    | No                      | Yes                    | Yes                     | Yes                  | Yes                   |
| P value summary                     | ns           | ns            | ns                     | **                      | ns                     | ns                      | ns                   | ns                    |
| Sum                                 | 26.96        | 82.90         | 26.24                  | 65.68                   | 31.28                  | 81.86                   | 52.98                | 65.01                 |

### WT vs delta414-436

|                                           | Data Set-A             |
|-------------------------------------------|------------------------|
| Table Analyzed                            | Fig S2B                |
| Column A                                  | dTIS11-V5 NT           |
| vs                                        | vs                     |
| Column C                                  | dTIS11 Δ 414-436-V5 NT |
| Mann Whitney test                         |                        |
| P value                                   | 0.1302                 |
| Exact or approximate P value?             | Gaussian Approximation |
| P value summary                           | ns                     |
| Are medians signif. different? (P < 0.05) | No                     |

|                             |             |
|-----------------------------|-------------|
| One- or two-tailed P value? | Two-tailed  |
| Sum of ranks in column A,C  | 1317 , 1099 |
| Mann-Whitney U              | 468.5       |

---

**WT vs delta214-436**

|                                           | Data Set-A             |
|-------------------------------------------|------------------------|
| Table Analyzed                            | Fig S2B                |
| Column A                                  | dTIS11-V5 NT           |
| vs                                        | vs                     |
| Column E                                  | dTIS11 Δ 254-436-V5 NT |
| Mann Whitney test                         |                        |
| P value                                   | 0.0148                 |
| Exact or approximate P value?             | Gaussian Approximation |
| P value summary                           | *                      |
| Are medians signif. different? (P < 0.05) | Yes                    |
| One- or two-tailed P value?               | Two-tailed             |
| Sum of ranks in column A,E                | 986.5 , 1429           |
| Mann-Whitney U                            | 391.5                  |

---

**WT vs delta1-110**

|                                           | Data Set-A             |
|-------------------------------------------|------------------------|
| Table Analyzed                            | Fig S2B                |
| Column A                                  | dTIS11-V5 NT           |
| vs                                        | vs                     |
| Column G                                  | dTIS11 Δ 1-110-V5 NT   |
| Mann Whitney test                         |                        |
| P value                                   | < 0.0001               |
| Exact or approximate P value?             | Gaussian Approximation |
| P value summary                           | ***                    |
| Are medians signif. different? (P < 0.05) | Yes                    |
| One- or two-tailed P value?               | Two-tailed             |
| Sum of ranks in column A,G                | 601.5 , 1884           |
| Mann-Whitney U                            | 6.500                  |

---

## Figure S2E - Raw data

This file can be opened by [GraphPad Prism](#) (version 5.00 or later).

This file contains 1 data tables and 0 info tables:

- [Fig S2E](#)

**Fig S2E**

| Cherry | Cherry+LMB | Cherry-dTIS11 WT | Cherry-dTIS11 WT +LMB | Cherry-dTIS11 L108 | Cherry-dTIS11 L108 +LMB | Cherry-dTIS11 M111A L113A | Cherry-dTIS11 M111A L113A +LMB | Cherry-dTIS11 delta98-113 | Cherry-dTIS11 delta98-113 +LMB |
|--------|------------|------------------|-----------------------|--------------------|-------------------------|---------------------------|--------------------------------|---------------------------|--------------------------------|
| 1,79   | 2,12       | 0,81             | 2,39                  | 1,68               | 2,35                    | 1,83                      | 1,51                           | 1,58                      | 2,23                           |
| 1,87   | 1,72       | 0,71             | 2,31                  | 1,28               | 2,42                    | 2,28                      | 2,4                            | 2,02                      | 1,7                            |
| 1,98   | 1,85       | 1,05             | 1,93                  | 1,72               | 2,39                    | 2                         | 1,87                           | 1,71                      | 1,72                           |
| 1,82   | 2,08       | 0,88             | 2,27                  | 1,85               | 2                       | 1,69                      | 2,74                           | 2,33                      | 2,33                           |
| 1,85   | 1,82       | 0,71             | 2,26                  | 1,38               | 2,22                    | 1,75                      | 2,62                           | 3,21                      | 1,91                           |
| 1,83   | 1,68       | 0,8              | 1,91                  | 1,83               | 2,51                    | 1,79                      | 1,56                           | 1,85                      | 1,57                           |
| 1,52   | 1,41       | 0,69             | 3,02                  | 1,82               | 2,36                    | 2,28                      | 2,55                           | 1,76                      | 2,08                           |
| 2,24   | 2,39       | 0,69             | 2,26                  | 1,53               | 2,74                    | 1,78                      | 1,38                           | 1,65                      | 3,04                           |
| 1,46   | 1,76       | 0,89             | 1,78                  | 2,4                | 2,26                    | 1,88                      | 3,28                           | 2,18                      | 2,09                           |
| 1,81   | 1,61       | 0,82             | 1,81                  | 1,53               | 2,52                    | 1,99                      | 2,2                            | 1,38                      | 1,59                           |
| 1,94   | 1,77       | 0,79             | 2,46                  | 1,58               | 3,7                     | 1,98                      | 1,56                           | 1,28                      | 2,21                           |
| 1,73   | 1,74       | 0,77             | 3,08                  | 1,42               | 2,4                     | 1,8                       | 2,69                           | 1,24                      | 1,96                           |
| 1,83   | 2,17       | 0,65             | 2,7                   | 1,54               | 2,47                    | 1,51                      | 2,22                           | 2,04                      | 1,69                           |
| 1,98   | 1,6        | 0,98             | 2,28                  | 1,96               | 1,42                    | 1,44                      | 2,47                           | 1,01                      | 2,24                           |
| 1,88   | 2,02       | 0,88             | 1,95                  | 1,67               | 2,06                    | 1,27                      | 2,61                           | 1,95                      | 2,14                           |
| 1,8    | 1,81       | 0,83             | 2,85                  | 1,79               | 2,46                    | 2,03                      | 2,47                           | 1,69                      | 2,51                           |
| 1,78   | 1,88       | 0,87             | 1,87                  | 1,39               | 2,57                    | 1,73                      | 2,24                           | 1,89                      | 2,23                           |
| 2,42   | 2,25       | 0,7              | 1,7                   | 1,24               | 2,17                    | 1,31                      | 2,52                           | 1,68                      | 1,91                           |
| 1,97   | 1,38       | 0,81             | 2,22                  | 1,59               | 2,27                    | 1,65                      | 2,37                           | 1,71                      | 2,47                           |
| 1,71   | 1,55       | 0,66             | 2,44                  | 1,74               | 1,85                    | 1,63                      | 1,41                           | 1,62                      | 1,82                           |
| 1,53   | 1,37       | 0,86             | 2,21                  | 1,63               | 2,29                    | 1,9                       | 1,83                           | 2,41                      | 2,5                            |
| 1,76   | 1,39       | 0,87             | 2,59                  | 1,52               | 2,09                    | 1,66                      | 1,54                           | 1,59                      | 2,28                           |
| 1,91   | 2,33       | 0,75             | 2,17                  | 1,28               | 2,38                    | 1,76                      | 2,46                           | 1,75                      | 2,58                           |
| 1,99   | 1,95       | 0,7              | 3,2                   | 1,94               | 2,18                    | 2,16                      | 2,54                           | 1,61                      | 1,93                           |
| 1,78   | 1,8        | 0,84             | 2,03                  | 1,69               | 1,93                    | 2,27                      | 2,52                           | 1,79                      | 2,58                           |
| 1,8    | 1,67       | 0,84             | 1,91                  | 1,86               | 2,22                    | 1,9                       | 2,16                           | 2,86                      | 2,05                           |
| 1,46   | 2,01       | 0,9              | 2,5                   | 1,61               | 1,64                    | 1,86                      | 1,28                           | 2,1                       | 2,53                           |
| 1,57   | 2,13       | 0,99             | 1,84                  | 1,58               | 2,44                    | 2,24                      | 1,4                            | 1,68                      | 1,97                           |
| 1,78   | 2,34       | 0,88             | 3,01                  | 1,41               | 2,64                    | 1,94                      | 2,39                           | 1,95                      | 2,39                           |
| 1,8    | 2,15       | 0,79             | 2,94                  | 1,32               | 3,09                    | 1,64                      | 2,21                           | 2,36                      | 2,27                           |
| 1,97   | 1,87       | 0,79             | 2,01                  | 1,82               | 2,54                    | 1,8                       |                                | 2,92                      | 2,65                           |
| 2,17   |            |                  | 2,49                  | 1,6                | 1,99                    | 1,73                      |                                | 1,46                      |                                |
| 1,71   |            |                  | 2,63                  |                    | 2,59                    |                           |                                | 1,79                      |                                |
|        |            |                  | 2,39                  |                    | 2,39                    |                           |                                |                           |                                |
|        |            |                  | 3,08                  |                    |                         |                           |                                |                           |                                |
|        |            |                  | 2,1                   |                    |                         |                           |                                |                           |                                |

Fig S2E Dot plot

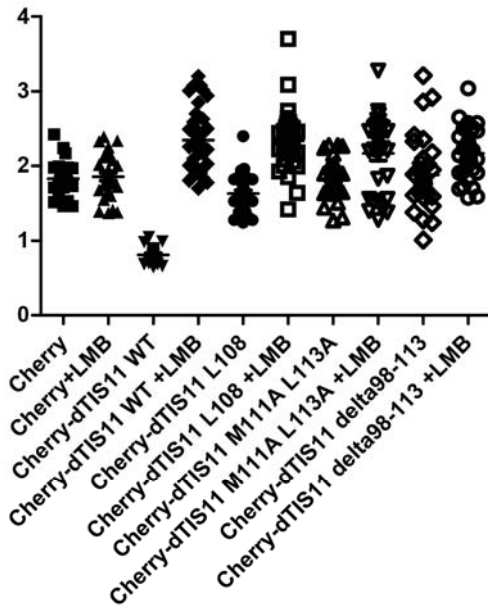

Fig S2E Mean +SD

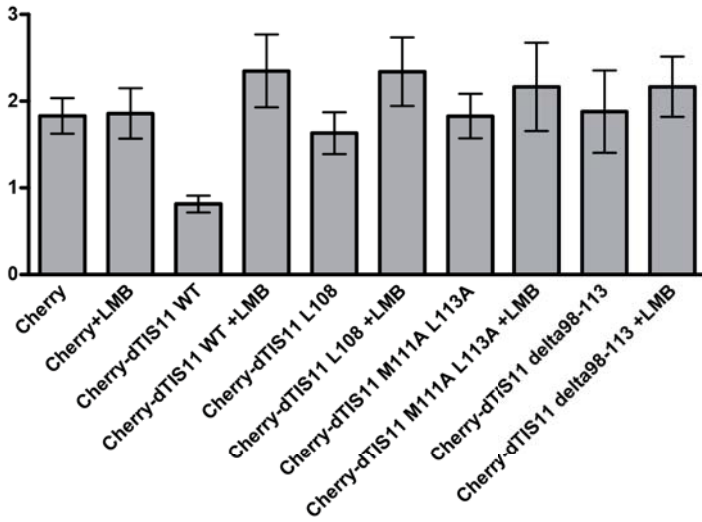

Fig S2E Mean +SEM

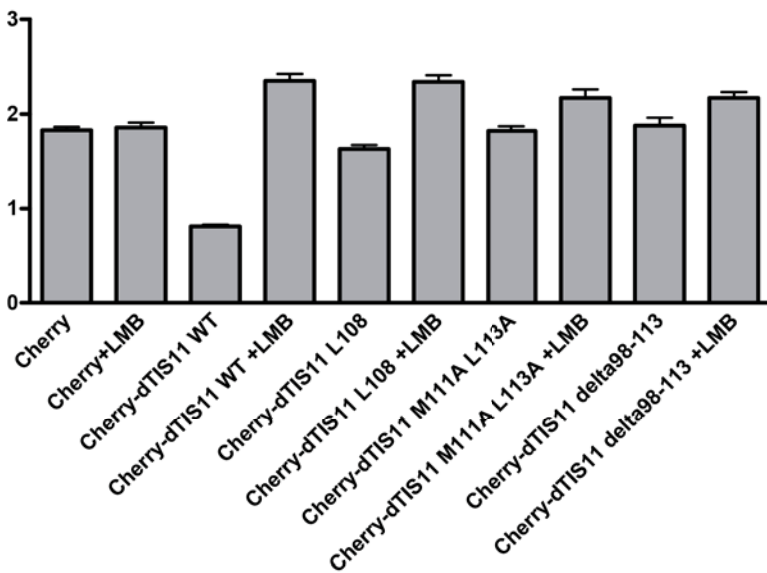

# Figure S2E - Statistical analysis

This file can be opened by [GraphPad Prism](#) (version 5.00 or later).

This file contains 4 data tables and 0 info tables:

- [Col Stats of Fig S2E](#)
- [WT vs L108A](#)
- [WT vs M111A L113A](#)
- [WT vs delta98-113](#)

## Col Stats of Fig S2E

|                                     | Cherry  | Cherry+LMB | Cherry-dTIS11 WT | Cherry-dTIS11 WT +LMB | Cherry-dTIS11 L108 | Cherry-dTIS11 L108 +LMB | Cherry-dTIS11 M111A L113A | Cherry-dTIS11 M111A L113A +LMB | Cherry-dTIS11 delta98-113 | Cherry-dTIS11 delta98-113 +LMB |
|-------------------------------------|---------|------------|------------------|-----------------------|--------------------|-------------------------|---------------------------|--------------------------------|---------------------------|--------------------------------|
| Number of values                    | 33      | 31         | 31               | 36                    | 32                 | 34                      | 32                        | 30                             | 33                        | 31                             |
| Minimum                             | 1.460   | 1.370      | 0.6500           | 1.700                 | 1.240              | 1.420                   | 1.270                     | 1.280                          | 1.010                     | 1.570                          |
| 25% Percentile                      | 1.745   | 1.670      | 0.7100           | 1.965                 | 1.445              | 2.150                   | 1.668                     | 1.560                          | 1.615                     | 1.910                          |
| Median                              | 1.810   | 1.820      | 0.8100           | 2.275                 | 1.605              | 2.370                   | 1.800                     | 2.305                          | 1.760                     | 2.210                          |
| 75% Percentile                      | 1.955   | 2.120      | 0.8800           | 2.620                 | 1.813              | 2.513                   | 1.988                     | 2.525                          | 2.070                     | 2.470                          |
| Maximum                             | 2.420   | 2.390      | 1.050            | 3.200                 | 2.400              | 3.700                   | 2.280                     | 3.280                          | 3.210                     | 3.040                          |
| Mean                                | 1.832   | 1.859      | 0.8129           | 2.350                 | 1.631              | 2.340                   | 1.828                     | 2.167                          | 1.880                     | 2.167                          |
| Std. Deviation                      | 0.2052  | 0.2920     | 0.09788          | 0.4218                | 0.2422             | 0.3953                  | 0.2572                    | 0.5097                         | 0.4763                    | 0.3491                         |
| Std. Error                          | 0.03573 | 0.05245    | 0.01758          | 0.07030               | 0.04282            | 0.06780                 | 0.04546                   | 0.09306                        | 0.08292                   | 0.06270                        |
| Lower 95% CI of mean                | 1.759   | 1.752      | 0.7770           | 2.207                 | 1.544              | 2.202                   | 1.735                     | 1.976                          | 1.711                     | 2.039                          |
| Upper 95% CI of mean                | 1.904   | 1.966      | 0.8488           | 2.492                 | 1.719              | 2.478                   | 1.920                     | 2.357                          | 2.049                     | 2.295                          |
| KS normality test                   |         |            |                  |                       |                    |                         |                           |                                |                           |                                |
| KS distance                         | 0.1291  | 0.08385    | 0.1115           | 0.09342               | 0.07876            | 0.1457                  | 0.09628                   | 0.1614                         | 0.1509                    | 0.06832                        |
| P value                             | > 0.10  | > 0.10     | > 0.10           | > 0.10                | > 0.10             | 0.0650                  | > 0.10                    | 0.0446                         | 0.0543                    | > 0.10                         |
| Passed normality test (alpha=0.05)? | Yes     | Yes        | Yes              | Yes                   | Yes                | Yes                     | Yes                       | No                             | Yes                       | Yes                            |
| P value summary                     | ns      | ns         | ns               | ns                    | ns                 | ns                      | ns                        | *                              | ns                        | ns                             |
| Sum                                 | 60.44   | 57.62      | 25.20            | 84.59                 | 52.20              | 79.55                   | 58.48                     | 65.00                          | 62.05                     | 67.17                          |

## WT vs L108A

|                                           | Data Set-A             |
|-------------------------------------------|------------------------|
| Table Analyzed                            | Data 1                 |
| Column C                                  | WT                     |
| vs                                        | vs                     |
| Column E                                  | L108                   |
| Mann Whitney test                         |                        |
| P value                                   | < 0.0001               |
| Exact or approximate P value?             | Gaussian Approximation |
| P value summary                           | ***                    |
| Are medians signif. different? (P < 0.05) | Yes                    |
| One- or two-tailed P value?               | Two-tailed             |
| Sum of ranks in column C,E                | 496 , 1520             |
| Mann-Whitney U                            | 0.0000                 |

## WT vs M111A L113A

|                | Data Set-A  |
|----------------|-------------|
| Table Analyzed | Data 1      |
| Column C       | WT          |
| vs             | vs          |
| Column G       | M111A L113A |



|                                           |                        |
|-------------------------------------------|------------------------|
| Mann Whitney test                         |                        |
| P value                                   | < 0.0001               |
| Exact or approximate P value?             | Gaussian Approximation |
| P value summary                           | ***                    |
| Are medians signif. different? (P < 0.05) | Yes                    |
| One- or two-tailed P value?               | Two-tailed             |
| Sum of ranks in column C,G                | 496 , 1520             |
| Mann-Whitney U                            | 0.0000                 |

---

**WT vs delta98-113**

|                                           | Data Set-A             |
|-------------------------------------------|------------------------|
| Table Analyzed                            | Fig S2E                |
| Column C                                  | WT                     |
| vs                                        | vs                     |
| Column I                                  | delta98-113            |
| Mann Whitney test                         |                        |
| P value                                   | < 0.0001               |
| Exact or approximate P value?             | Gaussian Approximation |
| P value summary                           | ***                    |
| Are medians signif. different? (P < 0.05) | Yes                    |
| One- or two-tailed P value?               | Two-tailed             |
| Sum of ranks in column C,I                | 497 , 1583             |
| Mann-Whitney U                            | 1.000                  |

---

# Figure S3C - Raw data

This file can be opened by [GraphPad Prism](#) (version 5.00 or later).

This file contains 1 data tables and 0 info tables:

- [Fig S3C](#)

**Fig S3C**

| dTIS11-V5 NT | dTIS11-V5 LMB | dTIS11 C179A-V5 NT | dTIS11 C179A-V5 LMB | dTIS11 C156A C179A-V5 NT | dTIS11 C156A C179A-V5 LMB |
|--------------|---------------|--------------------|---------------------|--------------------------|---------------------------|
| 0,86         | 2,38          | 0,68               | 2,61                | 0,81                     | 3,45                      |
| 0,79         | 1,27          | 0,68               | 2,35                | 0,91                     | 3,96                      |
| 0,86         | 2,38          | 1,04               | 4,78                | 0,85                     | 4,67                      |
| 0,59         | 1,35          | 0,98               | 3,37                | 0,8                      | 2,11                      |
| 0,7          | 2,1           | 0,94               | 3,1                 | 0,9                      | 3,94                      |
| 0,87         | 1,66          | 1                  | 3,34                | 0,81                     | 2,28                      |
| 0,9          | 1,79          | 0,94               | 3,6                 | 0,98                     | 3,44                      |
| 0,93         | 2,51          | 0,87               | 5,05                | 0,99                     | 4,07                      |
| 0,73         | 1,64          | 1,03               | 3,65                | 0,76                     | 3,25                      |
| 0,76         | 3,95          | 0,7                | 1,77                | 1,03                     | 5,05                      |
| 0,6          | 3,62          | 0,82               | 3,23                | 0,96                     | 2,08                      |
| 0,72         | 2,06          | 1,08               | 6,81                | 0,75                     | 1,89                      |
| 0,75         | 2,79          | 0,84               | 3,75                | 0,94                     | 2,62                      |
| 0,71         | 1,63          | 0,73               | 9,09                | 0,7                      | 3,51                      |
| 0,75         | 2,03          | 0,77               | 4,04                | 0,82                     | 2,4                       |
| 0,81         | 3,43          | 0,82               | 4,33                | 0,69                     | 4,77                      |
| 0,67         | 1,3           | 0,96               | 3,49                | 0,75                     | 3,59                      |
| 0,99         | 1,19          | 0,89               | 6,53                | 0,87                     | 2,8                       |
| 0,91         | 2,12          | 0,73               | 3,18                | 0,9                      | 2,93                      |
| 0,64         | 2,33          | 0,89               | 4,1                 | 0,82                     | 4,05                      |
| 0,77         | 1,41          | 0,88               | 2,26                | 0,93                     | 4,35                      |
| 0,82         | 2,24          | 0,8                | 2,89                | 0,94                     | 6,67                      |
| 0,9          | 1,41          | 0,76               | 3,87                | 0,64                     | 2,63                      |
| 0,78         | 1,11          | 0,71               | 2,27                | 0,72                     | 3,13                      |
| 0,69         | 2,07          | 0,99               | 3,83                | 0,69                     | 3,24                      |
| 0,69         | 3,34          | 0,68               | 4,24                | 0,92                     | 4,2                       |
| 0,85         | 1,28          | 1,03               | 2,84                | 0,71                     | 3,95                      |
| 0,75         | 1,54          | 0,93               | 3,52                | 0,84                     | 1,77                      |
| 1            | 1,8           | 1,03               | 4,06                | 0,9                      | 4,17                      |
| 0,7          | 1,68          | 1,04               | 4,24                | 0,94                     | 4,4                       |
| 0,9          | 1,76          | 0,88               | 3,96                | 0,81                     | 7,54                      |
| 0,88         | 1,55          | 0,77               | 2,87                | 0,79                     | 6,32                      |
| 0,72         | 2,18          | 0,97               | 2,85                | 0,83                     | 4,85                      |
| 0,97         | 2,19          | 0,89               | 3,21                | 1,04                     | 3,26                      |
|              | 2,99          | 0,91               | 6,32                |                          | 6,13                      |
|              | 1,46          |                    | 6,65                |                          |                           |
|              | 1,34          |                    |                     |                          |                           |
|              | 1,07          |                    |                     |                          |                           |
|              | 1,71          |                    |                     |                          |                           |
|              | 1,9           |                    |                     |                          |                           |



## Figure S3C - Statistical analysis

This file can be opened by [GraphPad Prism](#) (version 5.00 or later).

This file contains 4 data tables and 0 info tables:

- [Col. stats of Fig S3C](#)
- [WT +LMB vs delta131-213 +LMB](#)
- [WT +LMB vs C179A +LMB](#)
- [WT +LMB vs C156A C179A +LMB](#)

### Col. stats of Fig S3C

|                                     | dTIS11-V5 NT | dTIS11-V5 LMB | dTIS11 C179A-V5 NT | dTIS11 C179A-V5 LMB | dTIS11 C156A C179A-V5 NT | dTIS11 C156A C179A-V5 LMB |
|-------------------------------------|--------------|---------------|--------------------|---------------------|--------------------------|---------------------------|
| Number of values                    | 34           | 40            | 35                 | 36                  | 34                       | 35                        |
| Minimum                             | 0.5900       | 1.070         | 0.6800             | 1.770               | 0.6400                   | 1.770                     |
| 25% Percentile                      | 0.7075       | 1.423         | 0.7700             | 2.943               | 0.7575                   | 2.800                     |
| Median                              | 0.7750       | 1.795         | 0.8900             | 3.625               | 0.8350                   | 3.590                     |
| 75% Percentile                      | 0.8850       | 2.308         | 0.9800             | 4.240               | 0.9325                   | 4.400                     |
| Maximum                             | 1.000        | 3.950         | 1.080              | 9.090               | 1.040                    | 7.540                     |
| Mean                                | 0.7929       | 1.989         | 0.8760             | 3.946               | 0.8453                   | 3.813                     |
| Std. Deviation                      | 0.1088       | 0.7075        | 0.1213             | 1.509               | 0.1043                   | 1.368                     |
| Std. Error                          | 0.01867      | 0.1119        | 0.02050            | 0.2515              | 0.01789                  | 0.2312                    |
| Lower 95% CI of mean                | 0.7550       | 1.763         | 0.8343             | 3.435               | 0.8089                   | 3.343                     |
| Upper 95% CI of mean                | 0.8309       | 2.215         | 0.9177             | 4.456               | 0.8817                   | 4.283                     |
| KS normality test                   |              |               |                    |                     |                          |                           |
| KS distance                         | 0.09458      | 0.1303        | 0.09460            | 0.2051              | 0.1118                   | 0.1055                    |
| P value                             | > 0.10       | 0.0848        | > 0.10             | 0.0005              | > 0.10                   | > 0.10                    |
| Passed normality test (alpha=0.05)? | Yes          | Yes           | Yes                | No                  | Yes                      | Yes                       |
| P value summary                     | ns           | ns            | ns                 | ***                 | ns                       | ns                        |
| Sum                                 | 26.96        | 79.56         | 30.66              | 142.1               | 28.74                    | 133.5                     |

### WT +LMB vs delta131-213 +LMB

|                   | Data Set-A                  |
|-------------------|-----------------------------|
| Table Analyzed    | Fig S3C                     |
| Column B          | dTIS11-V5 LMB               |
| vs                | vs                          |
| Column D          | dTIS11 delta131-213 -V5 LMB |
| Mann Whitney test |                             |

|                                           |                        |
|-------------------------------------------|------------------------|
| P value                                   | 0.8359                 |
| Exact or approximate P value?             | Gaussian Approximation |
| P value summary                           | ns                     |
| Are medians signif. different? (P < 0.05) | No                     |
| One- or two-tailed P value?               | Two-tailed             |
| Sum of ranks in column B,D                | 1540 , 1310            |
| Mann-Whitney U                            | 680.0                  |

---

**WT +LMB vs C179A +LMB**

|                                           | Data Set-A             |
|-------------------------------------------|------------------------|
| Table Analyzed                            | Fig S3C                |
| Column B                                  | dTIS11-V5 LMB          |
| vs                                        | vs                     |
| Column F                                  | dTIS11 C179A-V5 LMB    |
| Mann Whitney test                         |                        |
| P value                                   | < 0.0001               |
| Exact or approximate P value?             | Gaussian Approximation |
| P value summary                           | ***                    |
| Are medians signif. different? (P < 0.05) | Yes                    |
| One- or two-tailed P value?               | Two-tailed             |
| Sum of ranks in column B,F                | 928.5 , 1998           |
| Mann-Whitney U                            | 108.5                  |

---

**WT +LMB vs C156A C179A +LMB**

|                                           | Data Set-A                |
|-------------------------------------------|---------------------------|
| Table Analyzed                            | Fig S3C                   |
| Column B                                  | dTIS11-V5 LMB             |
| vs                                        | vs                        |
| Column H                                  | dTIS11 C156A C179A-V5 LMB |
| Mann Whitney test                         |                           |
| P value                                   | < 0.0001                  |
| Exact or approximate P value?             | Gaussian Approximation    |
| P value summary                           | ***                       |
| Are medians signif. different? (P < 0.05) | Yes                       |
| One- or two-tailed P value?               | Two-tailed                |
| Sum of ranks in column B,H                | 953.5 , 1897              |
| Mann-Whitney U                            | 133.5                     |

---
